1 **Evidence for both phylogenetic conservatism and lability in the evolution of**  
2 **secondary chemistry in a tropical angiosperm radiation**

3  
4 Kathryn A. Uckele,<sup>1,2,3\*</sup> Joshua P. Jahner,<sup>1,2\*</sup> Eric J. Tepe,<sup>4</sup> Lora A. Richards,<sup>1,2,3</sup> Lee A.  
5 Dyer,<sup>1,2,3,5</sup> Kaitlin M. Ochsenrider,<sup>6</sup> Casey S. Philbin,<sup>3</sup> Massuo J. Kato,<sup>7</sup> Lydia F. Yamaguchi,<sup>7</sup>  
6 Matthew L. Forister,<sup>1,2,3</sup> Angela M. Smilanich,<sup>1,2</sup> Craig D. Dodson,<sup>6</sup> Christopher S. Jeffrey,<sup>1,3,6</sup>  
7 Thomas L. Parchman<sup>1,2</sup>

8 *\*These authors contributed equally*

9  
10 <sup>1</sup>Program in Ecology, Evolution, and Conservation Biology, University of Nevada, Reno, NV  
11 89557, USA; <sup>2</sup>Department of Biology, University of Nevada, Reno, NV 89557, USA;  
12 <sup>3</sup>Hitchcock Center for Chemical Ecology, University of Nevada, Reno, NV, 89557, USA;  
13 <sup>4</sup>Department of Biological Sciences, University of Cincinnati, Cincinnati, OH 45221, USA;  
14 <sup>5</sup>Sección Invertebrados, Museo Ecuatoriano de Ciencias Naturales, Quito, Ecuador; <sup>6</sup>Department  
15 of Chemistry, University of Nevada, Reno, NV 89557, USA; <sup>7</sup>Department of Fundamental  
16 Chemistry, Institute of Chemistry, University of São Paulo, São Paulo, Brazil

17  
18 **Author for correspondence:** Joshua P. Jahner, Email: [jjjahner@gmail.com](mailto:jjjahner@gmail.com)

19 **Total word count:** 6,461

20 **Introduction word count:** 1,344

21 **Materials & Methods word count:** 2,177

22 **Results word count:** 1,084

23 **Discussion word count:** 1,856

24 **Number of figures:** 4 (Figs. 1, 2, and 4 should be published in color)

25 **Number of tables:** 2

26 **Supplementary material:**

27 **Table S1.** Sampling information for all individuals.

28 **Fig. S1.** Results of the multivariate K test on 1000 permutations of all chemical regions.

29

30

## 31 **Summary**

32 Over evolutionary timescales, shifts in plant secondary chemistry may be associated with  
33 patterns of diversification in associated arthropods. Although foundational hypotheses of plant-  
34 insect codiversification and plant defense theory posit closely related plants should have similar  
35 chemical profiles, numerous studies have documented variation in the degree of phylogenetic  
36 signal, suggesting phytochemical evolution is more nuanced than initially assumed. We utilize  
37 proton nuclear magnetic resonance ( $^1\text{H}$  NMR) data, chemical classification, and genotyping-by-  
38 sequencing to resolve evolutionary relationships and characterize the evolution of secondary  
39 chemistry in the Neotropical plant clade *Radula* (*Piper*; Piperaceae). Sequencing data  
40 substantially improved phylogenetic resolution relative to past studies, and spectroscopic  
41 characterization revealed the presence of 35 metabolite classes. Broad metabolite classes  
42 displayed strong phylogenetic signal, whereas the crude  $^1\text{H}$  NMR spectra featured evolutionary  
43 lability in chemical resonances. Evolutionary correlations were detected in two pairs of  
44 compound classes (flavonoids with chalcones; *p*-alkenyl phenols with kavalactones), where the  
45 gain or loss of a class was dependent on the other's state. Overall, the evolution of secondary  
46 chemistry in *Radula* is characterized by strong phylogenetic signal of broad compound classes  
47 and concomitant evolutionary lability of specialized chemical motifs, consistent with both classic  
48 evolutionary hypotheses and recent examinations of phytochemical evolution in young lineages.

49

50 **Keywords:** genotyping-by-sequencing, nuclear magnetic resonance ( $^1\text{H}$  NMR), phylogenetic  
51 comparative analyses, phylogenetic signal, phytochemistry, *Piper*, *Radula*

## 52 **Introduction**

53 Plant secondary chemistry affects plant-herbivore interactions at various stages  
54 throughout an insect's lifespan: mixtures of compounds can shape adult oviposition preferences  
55 (Thompson & Pellmyr, 1991), specific chemical compounds can stimulate larval feeding  
56 (Bowers, 1983, 1984), plant chemistry can deter insect herbivores via toxicity or physiological  
57 disruptions (Malcolm, 1994; Zagrobelny *et al.*, 2004), and sequestered metabolites can alter  
58 immune function against natural enemies (Smilanich *et al.*, 2009; Richards *et al.*, 2012). Plants  
59 capable of developing novel chemical defenses are hypothesized to accrue higher fitness in  
60 response to enemy release (e.g., Berenbaum, 1978), potentially resulting in the diversification of  
61 plant lineages with conserved chemical phenotypes (the escape and radiate hypothesis; Ehrlich &  
62 Raven, 1964; Thompson, 1989; reviewed by Janz, 2011). Coevolutionary hypotheses and plant  
63 defense theory (reviewed by Mithöfer & Boland, 2012) have yielded clear predictions that  
64 herbivory, additional trophic interactions, and resource availability shape the evolution of plant  
65 defenses, including secondary metabolites (Agrawal *et al.*, 2009; Maron *et al.*, 2019). However,  
66 an evolutionary response to these biotic and abiotic pressures could be complex and highly  
67 context-dependent.

68 Due in part to the enzymatic complexity of metabolic biosynthesis, phylogenetic  
69 conservatism is the null hypothesis for the evolution of plant secondary chemistry (Agrawal &  
70 Fishbein, 2006; Salazar *et al.*, 2018). Indeed, expectations of phylogenetic conservatism appear  
71 to hold at deep evolutionary scales; for example, the family Solanaceae is characterized by the  
72 presence of tropane alkaloids (Griffin & Lin, 2000), though they are consistently present in only  
73 3 of 19 tribes (Datureae, Hyoscyameae, Mandragoreae) and sporadically found elsewhere (Wink,  
74 2003). Further, recent work suggests more classes of secondary metabolites are phylogenetically  
75 conserved in large seed plant clades (e.g., eudicots and superasterids) than at lower taxonomic  
76 scales (e.g., orders and families) (Zhang *et al.*, 2020). However, at shallower scales, numerous  
77 studies provide evidence for evolutionary lability in chemical traits within genera (e.g., Becerra,  
78 1997; Kursar *et al.*, 2009; Agrawal *et al.*, 2009; Rasmann & Agrawal, 2011; Salazar *et al.*, 2016;  
79 Moreira *et al.*, 2018; Allevalo *et al.*, 2019), suggesting that surveys of phytochemical variation  
80 within young plant lineages might yield variable perspectives on the evolution of secondary  
81 chemistry. Adding further complexity, many studies have found evidence for strong evolutionary  
82 associations among chemical classes (Kariñho-Betancourt *et al.*, 2015; Boachon *et al.*, 2018;

83 Allevato *et al.*, 2019). For example, Johnson *et al.* (2014) found a strong positive correlation  
84 between flavonoids and phenolic diversity and a strong negative correlation between  
85 ellagitannins and flavonoids across a phylogeny of 26 evening primroses (*Oenothera*:  
86 Onagraceae). Such associations are relevant because they may reflect evolutionary constraints,  
87 and their causes may be varied. For example, positive associations may be associated with  
88 chemical defense syndromes (Agrawal & Fishbein, 2006; Agrawal, 2007) or synergistic effects  
89 of multiple classes on herbivore deterrence (Dyer *et al.*, 2003; Richards *et al.*, 2016).  
90 Alternatively, negative associations might be consistent with evolutionary tradeoffs or at least  
91 different optima in defense space (Agrawal, 2007; Johnson *et al.*, 2014). By leveraging advances  
92 in organic chemistry and genomics, we stand to increase phylogenetic and metabolomic  
93 resolution to provide novel insight into the evolution of phytochemistry.

94         Recent advances in chemical ecology have improved perspectives on phytochemical  
95 diversity across a broad range of taxonomic groups and metabolite classes (Sedio, 2017; Dyer *et al.*, 2018). High throughput processing of plant tissue, rapid advances in spectroscopy, and  
96 improved ordination and network analyses have enabled characterization of metabolomic  
97 variation across plant communities (Richards *et al.*, 2016; Salazar *et al.*, 2016, 2018; Dyer *et al.*,  
98 2018; Sedio *et al.*, 2018; Ernst *et al.* 2019; Kang *et al.* 2019) and stand to enhance our  
100 understanding of phytochemical evolution across taxonomic scales (Sedio, 2017). Additionally,  
101 structural metabolomic approaches like <sup>1</sup>H NMR can provide improved resolution of structural  
102 variation across a wide range of metabolite classes. Selection on the plant metabolome is  
103 inherently multivariate, arising from diverse herbivore communities and environmental  
104 conditions (Fine *et al.*, 2006; Salazar *et al.*, 2018), and even relatively small structural changes  
105 can impart disproportionate shifts in bioactivity. Thus, approaches that capture a larger  
106 proportion of the structural variation underlying phytochemical phenotypes could be well suited  
107 to addressing hypotheses concerning evolutionary patterns.

108         Next-generation sequencing data has reinvigorated phylogenetic analyses of traditionally  
109 challenging groups characterized by recent or rapid diversification (Wagner *et al.*, 2013; Bagley  
110 *et al.*, 2020; L veill -Bourret *et al.*, 2020) as well as hybridization (Eaton & Ree, 2013; Carter *et al.*, 2019; Hipp *et al.*, 2020). Reduced representation DNA sequencing approaches [e.g.,  
111 RADseq; genotyping-by-sequencing (GBS)] have been increasingly utilized in phylogenetic  
112 studies due to their ability to effectively sample large numbers of orthologous loci throughout the  
113

114 genomes of non-model organisms without the need for prior genomic resources (Leaché & Oaks,  
115 2017; Parchman *et al.*, 2018). Nearly all such studies have reported increased topological  
116 accuracy and support compared with past phylogenetic inference based on smaller numbers of  
117 Sanger-sequenced loci (Herrera & Shank, 2016; Massatti *et al.*, 2016; Du *et al.*, 2020), especially  
118 when applied to diverse radiations (Wagner *et al.*, 2013; Fernández-Mazuecos *et al.*, 2017;  
119 Hamon *et al.*, 2017; Paetzold *et al.*, 2019). While reduced representation approaches have clear  
120 phylogenetic utility at relatively shallow time scales, they have also performed well for  
121 moderately deep divergence (Eaton *et al.*, 2017; Du *et al.*, 2020).

122 *Piper* (Piperaceae) is a highly diverse, pantropical genus of nearly 2,600 accepted species  
123 (Callejas-Posada, 2020), with the highest diversity occurring in the Neotropics (Gentry, 1993;  
124 Martínez *et al.*, 2015). Chemically, *Piper* is impressively diverse (Parmar *et al.*, 1997; Dyer &  
125 Palmer, 2004; Richards *et al.*, 2015): chemical profiling in a modest number of taxa has yielded  
126 667 different compounds from 11 distinct structural classes thus far (Parmar *et al.*, 1997; Dyer *et*  
127 *al.*, 2004; Kato & Furlan, 2007; Richards *et al.*, 2018). This phytochemical diversity has likely  
128 contributed to the diversification of several herbivorous insect lineages that specialize on *Piper*,  
129 including most notably the geometrid moth genus *Eois* (Strutzenberger *et al.*, 2012; Wilson *et*  
130 *al.*, 2012; Jahner *et al.*, 2017). Furthermore, phytochemical variation in *Piper* communities has  
131 been shown to shape tri-trophic interactions and the structure of tropical communities (Dyer *et*  
132 *al.*, 2004; Glassmire *et al.*, 2016; Richards *et al.*, 2018). As a species-rich genus with abundant  
133 and ecologically consequential phytochemical variation, *Piper* represents a valuable system for  
134 understanding how the history of diversification underlies the evolution of phytochemical  
135 variation.

136 *Piper* is an old lineage (~72 Ma), yet most of its diversification occurred in the  
137 Neotropics during the last 30-40 My following Andean uplift and the emergence of Central  
138 America (Smith *et al.*, 2008; Martínez *et al.*, 2015). The largest clade of *Piper*, *Radula*,  
139 exemplifies this pattern, as much of its extant diversity (~450 species) arose relatively recently  
140 during the Miocene (Martínez *et al.*, 2015). Such bouts of rapid and recent diversification have  
141 limited the efficacy of traditional Sanger sequencing methods to resolve the timing and tempo of  
142 diversification in *Piper* (Jaramillo *et al.*, 2008; Smith *et al.*, 2008). Past phylogenetic analyses  
143 utilizing Sanger-sequenced nuclear and chloroplast regions have consistently inferred eleven  
144 major clades within *Piper*; however, phylogenetic resolution within these clades has been elusive

145 (Jaramillo *et al.*, 2008; Smith *et al.*, 2008; Molina-Henao *et al.*, 2016; Asmarayani, 2018).  
146 Phylogenetic inference based on genome-wide data spanning a range of genealogical histories  
147 has recently improved phylogenetic resolution for diverse radiations (e.g., Wagner *et al.*, 2013;  
148 Paetzold *et al.*, 2019), and should facilitate an understanding of evolutionary patterns of  
149 phytochemical variation in *Piper* and their consequences for plant-insect codiversification.

150 We leveraged complementary phylogenomic, metabolite classification, and <sup>1</sup>H NMR data  
151 sets to generate a *Piper* phylogeny and explore the evolution of secondary chemistry within the  
152 largest *Piper* clade (Radula). Specifically, our goals were to: 1) resolve the evolutionary  
153 relationships within the Radula clade of *Piper* included in this study; 2) characterize  
154 metabolomic variation across the genus and within Radula in particular; and 3) quantify the  
155 strength of phylogenetic signal and detect evolutionary associations in Radula secondary  
156 chemistry. Because secondary chemistry is an emergent composite phenotype of many traits that  
157 can evolve semi-independently, we expected to detect mixed strengths of phylogenetic signal  
158 and strong associations among a subset of traits over evolutionary time.

159

## 160 **Materials and Methods**

### 161 **Study system and sample collection**

162 For phylogenetic and chemical analyses, we collected leaf material from 71 individuals  
163 representing 65 Neotropical *Piper* species from the following clades: Churumayu ( $N = 3$ ),  
164 Hemipodium ( $N = 1$ ), Isophyllon ( $N = 5$ ), Macrostachys ( $N = 4$ ), Peltobryon ( $N = 2$ ),  
165 Pothomorphe ( $N = 1$ ), Radula ( $N = 44$ ), and Schilleria ( $N = 5$ ). For chemical profiling and DNA  
166 sequencing, we collected the youngest, fully expanded leaves and dried them immediately with  
167 silica gel. Vouchers were pressed, dried, and deposited in one or more herbaria for future  
168 reference and species verification (Table S1). To investigate the evolution of phytochemistry at a  
169 relatively shallow evolutionary scale, we conducted the majority of our sampling within Radula  
170 (Martínez *et al.*, 2015).

171

### 172 **Phylogenetic analyses**

173 Genome-wide polymorphism data was generated for 71 individuals for phylogenetic  
174 analyses. Either the same accession sampled for chemical analysis, or an individual from the  
175 same population as the one sampled, were sequenced with a genotyping-by-sequencing approach

176 (Parchman *et al.*, 2012) that is analogous to ddRADseq (Peterson *et al.* 2012). Briefly, genomic  
177 DNA was digested with two restriction enzymes, *EcoRI* and *MseI*. Sample-specific barcoded  
178 oligos containing Illumina adaptors were annealed to the *EcoRI* cut sites, and oligos containing  
179 the alternative Illumina adaptor were annealed to the *MseI* cut sites. Fragments were PCR  
180 amplified and pooled for sequencing. The library was size-selected for fragments between 350 -  
181 450 base pairs (bp) with the Pippin Prep System (Sage Sciences, Beverly, MA), and sequenced  
182 on two lanes of an Illumina HiSeq 2500 at the University of Texas Genome Sequencing and  
183 Analysis Facility (Austin, TX). Single-end, 100 bp, raw sequence data were filtered for  
184 contaminants (*E. coli*, *PhiX*, Illumina adaptors or primers) and low quality reads using  
185 `bowtie2_db` (Langmead & Salzberg, 2012) and a pipeline of bash and perl scripts  
186 (<https://github.com/ncgr/tapioca>). We used custom perl scripts to demultiplex our reads by  
187 individual and trim barcodes and restriction site-associated bases.

188         Assembly and initial filtering was conducted with `ipyRAD` v.0.7.30 (Eaton, 2014).  
189 `ipyRAD` was specifically designed to assemble RADseq data for phylogenetic applications,  
190 permits customization of clustering and filtering, and allows for indel variation among samples  
191 (Eaton, 2014). Because a suitable *Piper* genome was not available at the time of analysis, we  
192 generated a *de novo* consensus reference of sampled genomic regions with `ipyRAD`. Briefly,  
193 nucleotide sites with phred quality scores lower than 33 were treated as missing data. Sequences  
194 were clustered within individuals according to an 85% similarity threshold with `vsearch`  
195 (Rognes *et al.*, 2016) and aligned with `muscle` (Edgar, 2004) to produce stacks of highly similar  
196 RADseq reads (hereafter, RADseq loci). The sequencing error rate and heterozygosity were  
197 jointly estimated for all RADseq loci with a depth >6, and these parameters informed statistical  
198 base calls according to a binomial model. Consensus sequences for each individual in the  
199 assembly were clustered once more, this time across individuals, and discarded if possessing >8  
200 indels (`max_Indels_locus`), >50% heterozygous sites (`max_shared_Hs_locus`), or >20% variable  
201 sites (`max_SNPs_locus`). To reduce the amount of missing data in our alignment matrix,  
202 RADseq loci were retained if they were present in at least 50 of 71 samples. The nexus file of  
203 concatenated consensus sequences for each individual, including invariant sites, were used as  
204 input for the Bayesian phylogenetic methods described below. The nexus alignment as well as  
205 complete information on additional parameter settings for this analysis are archived at Dryad  
206 (<https://doi.org/10.5061/dryad.j6q573nc7>).

207 To resolve patterns of diversification and to provide a foundation for investigating  
208 variation in the rates of phytochemical evolution, we estimated a rooted, calibrated tree  
209 according to a relaxed clock model in `RevBayes` v.1.0.12 (Höhna *et al.*, 2016), which provides  
210 the ability to specify custom phylogenetic models for improved flexibility compared with other  
211 Bayesian approaches. The prior distribution on node ages was defined by a birth-death process in  
212 which the hyper priors on speciation and extinction rates were exponentially distributed with  $\lambda =$   
213 10. We relaxed the assumption of a global molecular clock by allowing each branch-rate variable  
214 to be drawn from a lognormal distribution. After comparing the relative fits of JC, HKY, GTR,  
215 and GTR+Gamma nucleotide substitution models with Bayes factors, we modeled DNA  
216 sequence evolution according to the best-fit HKY model. Eight independent MCMC chains were  
217 run for 100,000 generations with a burn-in of 1,000 generations and sampled every 10  
218 generations. Chains were visually assessed for convergence with `Tracer` v.1.7.1 (Rambaut *et*  
219 *al.*, 2018) and numerically assessed with effective sample sizes (ESS), the Gelman–Rubin  
220 convergence diagnostic (Gelman & Rubin, 1992), and by comparing the posterior probabilities  
221 of clades sampled between MCMC chains. The maximum clade credibility (MCC) tree provided  
222 the ultrametric fixed tree topology and relative node ages for phylogenetic comparative methods  
223 described below.

224

## 225 **Chemical profiling**

226 Crude proton nuclear magnetic resonance ( $^1\text{H}$  NMR) spectroscopy was chosen for  
227 chemotype mapping due to its ability to characterize subtle structural variation across a wide  
228 range of compound classes in a single, reproducible, non-destructive analysis (Richards *et al.*  
229 2018). Briefly, after leaf samples were ground to fine powder, 2.00 g were transferred to a glass  
230 screw cap test tube with 10.0 ml of methanol, sonicated for 10 minutes, and filtered. This step  
231 was repeated and both filtrates were combined in a pre-weighed 20 ml scintillation vial. The  
232 solvent was removed *in vacuo* and dissolved in 0.6 ml methanol- $d_4$  for  $^1\text{H}$  NMR analysis.  
233 Extracts were analyzed on a Varian 400 MHz solution state NMR spectrometer with  
234 autosampler. Data were processed using MestReNova software (Mestrelab Research, Santiago de  
235 Compostela, Spain). Spectra from the crude extracts were aligned with the solvent peak ( $\text{CD}_3$ ,  $\delta$   
236 = 3.31 ppm), baseline corrected, phase corrected, and binned (0.04 ppm; 0.5 - 12 ppm). Solvent



237 and water peaks were removed and the binned spectra were normalized to a total area of 100.  
238 This data set is referred to subsequently as “crude  $^1\text{H}$  NMR”.

239 In addition to crude  $^1\text{H}$  NMR spectral chemotyping, we further annotated and  
240 characterized samples based upon the presence or absence of compound classes and in some  
241 cases, specific compounds. To further gain structural resolution across the crude extracts that  
242 were sampled, aliquots of the  $^1\text{H}$  NMR extracts were diluted and subjected to GC-MS and LC-  
243 MS analysis. Crude extracts were classified using chemotaxonomic classifications outlined in  
244 Parmar’s comprehensive review of *Piper* phytochemistry (Parmar *et al.*, 1997).

245 Presumptive compounds and compound classes were annotated based upon structural  
246 elucidation using  $^1\text{H}$  NMR, GC-MS fragmentation, and high-resolution LC-MS data.  
247 Comparison of the  $^1\text{H}$  NMR data to literature values of related compounds was used to increase  
248 confidence in these assignments. In some cases, crude 2D-NMR analysis was used to confirm  
249 structural classifications. Presence of a compound or compound class was determined based  
250 upon abundant and spectroscopically apparent evidence. This data set is referred to subsequently  
251 as “metabolite classes”.

252

253

#### 254 **Phylogenetic signal and evolution of metabolite classes**

255 To assess whether metabolite classes were phylogenetically conserved across *Radula*, we  
256 quantified phylogenetic signal in these binary traits using the D statistic (Fritz & Purvis, 2010).  
257 The D statistic calculates the sum of sister-clade differences,  $\Sigma d_{obs}$  (Felsenstein, 1985) for an  
258 observed tree and binary trait, and scales this value with the distributions of sums expected under  
259 two disparate evolutionary models, random and Brownian motion ( $\Sigma d_r$  and  $\Sigma d_b$ , respectively),  
260 using the following equation:

$$D = \frac{[\Sigma d_{obs} - mean(\Sigma d_b)]}{[mean(\Sigma d_r) - mean(\Sigma d_b)]}$$

261 Thus, D is expected to equal 1 when the observed binary trait is distributed randomly, lacking  
262 phylogenetic signal, and is expected to equal 0 when it exhibits phylogenetic signal as  
263 expected under Brownian motion. Tests of phylogenetic signal with the D statistic are most  
264 accurate when the ratio of presences and absences is closer to 1:1 (Fritz and Purvis, 2010). We  
265 used the *phylo.d* function in the *caper* package (Orme *et al.*, 2018) in R v.4.0.0 (R Core Team,

266 2020) to calculate the observed  $D$  for a subset of binary traits that were sufficiently present  
267 across the phylogeny. This value was compared to a distribution of  $D$  values simulated under  
268 models of phylogenetic randomness ( $D = 1$ ) and pure Brownian motion ( $D = 0$ ) to determine  
269 whether the observed  $D$  differed from either zero or one.

270 To detect evolutionary associations among pairs of metabolite classes within *Radula*, we  
271 used Pagel's (1994) method that models evolutionary changes in two binary traits,  $X$  and  $Y$ , as  
272 continuous-time Markov processes in which the probabilities of state transition at one trait may  
273 depend on the state at the other trait. Significant tests of correlated evolution were followed by  
274 tests of contingency, in which changes at  $X$  depend on the state of  $Y$ , or vice versa. Model fits,  
275 comparisons, and plots were performed with the *fitPagel* function in the `phytools` package  
276 (Revell, 2012) in R.

277

### 278 **Multivariate analyses of phylogenetic signal with crude $^1\text{H}$ NMR spectra**

279 While the analyses above based on broad classifications of structurally determined  
280 metabolites provide a coarse view of phytochemical evolution, these classifications are anchored  
281 to the foundations of plant secondary metabolite biosynthesis. Using  $^1\text{H}$  NMR spectra as a raw  
282 chemotype should allow a more detailed multivariate perspective on phytochemical variation.  
283 Studies on other plant taxa have typically detected some signal and evolutionary correlations for  
284 broad classes of compounds but not necessarily for specific compounds or biologically active  
285 moieties, both of which can be inferred from  $^1\text{H}$  NMR data. Multivariate approaches to  
286 phylogenetic comparative methods have provided insight into covarying suites of related traits,  
287 while simultaneously increasing the statistical power to detect phylogenetic signal (Zheng *et al.*,  
288 2009) and differences in trait means among taxa (Clavel *et al.*, 2015). Indeed, these multivariate  
289 approaches might be particularly useful when exploring the evolution of complex phenotypes,  
290 like the plant metabolome, which exhibit trait covariances due to metabolomic or functional  
291 associations (Dyer *et al.*, 2003; Richards *et al.*, 2010; Fukushima *et al.*, 2011). Here we utilize  
292 three multivariate methods to detect patterns of phylogenetic signal for 263 resonances found in  
293 the crude  $^1\text{H}$  NMR data: 1) principal components analyses (PCA); 2) multiple regression on  
294 distance matrices (MRM); and 3) multivariate estimation of phylogenetic signal.

295 To visualize patterns of chemotypic variation across all sampled species from all clades,  
296 we first analyzed the  $^1\text{H}$  NMR data with PCA using the *prcomp* function in R. If the major axes

297 of metabolomic variation are phylogenetically conserved, the plotted species scores should be  
298 clustered by clade in a rotated principal component (PC) space. Alternatively, if metabolomic  
299 variation is randomly distributed across the phylogeny, there should be little to no clustering by  
300 clade (Klingenberg & Gidaszewski, 2010). The degree to which plant clade predicted chemical  
301 similarity was assessed using permutational multivariate analysis of variance (permanova;  
302 Anderson, 2001) in the *vegan* package (Oksanen *et al.*, 2019) in R based on Euclidean distances  
303 of the first four PCs.

304 Mantel tests have been frequently used to assess the degree of phylogenetic signal in  
305 multivariate data (e.g., Cardini & Elton, 2008; Easson & Thacker, 2014; Salazar *et al.*, 2018) by  
306 estimating the relationship between phylogenetic and phenotypic distances. Simulations under  
307 scenarios of measurement error have found instances where Mantel tests outperform traditional  
308 univariate methods in detecting phylogenetic signal, especially as the number of traits increases  
309 (Hardy & Pavoine, 2012). Because we were unable to account for measurement error in our  
310 study, we utilized MRM to examine the relationship between metabolomic and phylogenetic  
311 distance at two evolutionary scales (within *Radula* and across all clades). Euclidean distances  
312 were calculated with the crude <sup>1</sup>H NMR spectra using the *dist* function in R, and two measures of  
313 phylogenetic distance were used as predictors: 1) Abouheif's proximity (Abouheif, 1999;  
314 Pavoine *et al.*, 2008) was calculated using the *proxTips* function in the *adephylo* package  
315 (Jombart *et al.*, 2010) in R; and 2) the square root of patristic distance was calculated using the  
316 *cophenetic.phylo* function in the *ape* package (Paradis *et al.*, 2004) in R. MRM analyses were  
317 implemented using the *MRM* function with 1000 permutations in the *ecodist* package (Goslee  
318 & Urban, 2007) in R.

319 Since Blomberg *et al.*'s (2003) *K* statistic exhibits higher statistical power to detect  
320 phylogenetic signal relative to Mantel tests (Harmon & Glor, 2010), we quantified phylogenetic  
321 signal of the crude <sup>1</sup>H NMR at both evolutionary scales using a multivariate generalization of the  
322 *K* statistic ( $K_{\text{mult}}$ ; Adams, 2014) with the *physignal* function in the *geomorph* package (Adams  
323 *et al.*, 2013) in R. The *K* statistic provides a statistical estimate of phylogenetic signal relative to  
324 expectations under Brownian motion, where values of *K* greater than 1 indicate phylogenetic  
325 signal greater than expected under Brownian motion, whereas values between 0 and 1 indicate  
326 less signal than expected under Brownian motion. Significance for the generalized *K* statistic was  
327 assessed by permuting the <sup>1</sup>H NMR peak data among the tips of the phylogeny for 999 iterations.

328 To determine whether the zero-inflated nature of the  $^1\text{H}$  NMR data influenced the detection of  
329 phylogenetic signal, we permuted our  $^1\text{H}$  NMR data set over 1000 iterations by randomly  
330 indexing our original  $^1\text{H}$  NMR data matrix. This permutation method preserves the original  
331 proportion of zeros in the matrix while obfuscating any observed phylogenetic signal. The  
332 generalized  $K$  statistic test was calculated for each permutation, and our observed generalized  $K$   
333 statistic was compared to the null distribution of permuted values.

334

## 335 **Results**

### 336 **Phylogenetic analyses**

337 After contaminant filtering and demultiplexing, we retained ~313 million Illumina reads  
338 for phylogenetic analyses. Initial clustering, variant calling, and filtering clustered reads into  
339 362,169 RADseq loci. There was a high proportion of missing data, presumably due to allelic  
340 dropout increasing with high levels of divergence among *Piper* clades. For Bayesian  
341 phylogenetic inference, we mitigated the influence of missing data by removing loci absent in  
342 >30% of samples. The final dataset for phylogenetic analyses consisted of 641 RADseq loci (~86  
343 bp in length each) that housed 9,113 genetic variants (51% parsimony informative). Aligned loci  
344 were concatenated into a nexus alignment with missing data at 18.9% of sites.

345 Bayesian phylogenetic analysis of ddRADseq data resolved eight major Neotropical  
346 *Piper* clades with high posterior support (Fig. 1). While past phylogenetic studies supported the  
347 monophyly of seven of these eight clades (Macrostachys, Radula, Peltobryon, Pothomorphe,  
348 Hemipodion, Isophyllon, and Schilleria) (Jaramillo *et al.*, 2008; Martínez *et al.* 2015), our  
349 analysis resolved an additional clade, Churumayu. Notably, Isophyllon and Churumayu were  
350 highly supported, monophyletic clades and not nested within Radula as was inferred in previous  
351 analyses (Jaramillo *et al.*, 2008). Contrary to previous phylogenetic hypotheses of *Piper*  
352 (Jaramillo *et al.*, 2008; Martínez *et al.*, 2015), our analyses might suggest Churumayu is the most  
353 basal clade, but we caution that this node had very low posterior support (51%). Intrageneric  
354 relationships below the clade level were highly resolved, with nearly all nodes exhibiting greater  
355 than 95% posterior support (Fig. 1), including within the diverse Radula clade (Fig. 1). Our  
356 phylogenetic hypothesis for Radula indicates three species (*P. hispidum*, *P. colonense*, *P.*  
357 *lucigaudens*) may be paraphyletic, reflecting past taxonomic uncertainty for these taxa.

358

### 359 **Phytochemical variation in *Piper***

360 Nearly all common compound classes that have been previously reported in *Piper* were  
361 observed from our compound characterization analysis (Salehi *et al.*, 2019). This analysis  
362 revealed the presence of metabolite classes that are ubiquitous across plant families (lignans,  
363 flavonoids/chalcones, etc.) as well as classes that are specifically common in *Piper* (amides)  
364 (Fig. 2). Specific compound characterization revealed genus specific compounds and compound  
365 classes (piplartine, cenocladamide, crassinervic acid, kava lactones), as well as metabolites that  
366 are more rarely reported in plants (putrescine diamides, nerolidyl catechol, alkenyl phenols,  
367 anuramide peptides) (Fig. 2).

368

### 369 **Metabolite phylogenetic signal and evolutionary associations**

370 For all eight metabolite classes that were examined, estimates of D (Fritz & Purvis, 2010)  
371 were low and did not deviate from a null distribution generated under a scenario of Brownian  
372 motion (Table 1), consistent with phylogenetic signal. Two of the eight traits, phenolic  
373 glycosides and lignans, exhibited strong phylogenetic signal ( $D < 0$ ), while the remaining six  
374 traits exhibited weak phylogenetic signal ( $0 < D < 1$ ). Further, all metabolite classes had  
375 observed values of D that differed from a null distribution generated under a phylogenetic  
376 randomness scenario (Table 1). The mean of the observed D estimates for the metabolite classes  
377 was 0.04, with the largest D statistic observed for the flavonoid class ( $d_{obs} = 0.49$ ) and the  
378 smallest observed for the phenolic glycosides ( $d_{obs} = -1.18$ ) (Table 1).

379 Evidence for correlated evolution was detected in two pairs of metabolite classes: 1)  
380 flavonoids and chalcones; and 2) *p*-alkenyl phenols and kavalactones/butenolides. For the first  
381 pair of traits, a model of contingency in which changes in chalcones depend on the state of  
382 flavonoids provided the best fit to the data (Table 2). In this model, when flavonoids are present,  
383 chalcone gains are almost two times more probable than chalcone losses; however, when  
384 flavonoids are absent, chalcone losses are much more probable than chalcone gains (Fig. 3). The  
385 alternative contingency model for this pair of traits (i.e., changes in flavonoids depend on the  
386 state of chalcone) was also a good fit to the data (Table 2). According to this model, when  
387 chalcones are present, flavonoid transitions are extremely probable, with flavonoid gains being  
388 approximately eight times more probable than flavonoid losses. Alternatively, when chalcones  
389 are absent, flavonoid losses are approximately five times more probable than flavonoid gains

390 (Fig. 3). For the second pair of traits, *p*-alkenyl phenols and kavalactones/butenolides, the best fit  
391 model was one of interdependent correlated evolution in which changes in *p*-alkenyl phenol  
392 depend on the state of kavalactones/butenolides, and vice versa (Table 2). When  
393 kavalactones/butenolides are present, *p*-alkenyl phenol transitions are more probable than when  
394 they are absent, with the loss of *p*-alkenyl phenols being much more probable than the gain of *p*-  
395 alkenyl phenols under both scenarios. Alternatively, when *p*-alkenyl phenols are present, the loss  
396 of kavalactones/butenolides is extremely probable relative to the gain of  
397 kavalactones/butenolides, which is rarely observed. When *p*-alkenyl phenols are absent,  
398 kavalactones/butenolides are rarely gained or lost (Fig. 3).

399

#### 400 **Phylogenetic signal in high-dimensional metabolomic data**

401 While broad metabolite classes uniformly exhibited at least moderate levels of  
402 phylogenetic signal, evidence for phylogenetic signal in multivariate analyses of the crude <sup>1</sup>H  
403 NMR data was mixed. PCs 1 & 2 and 3 & 4 explained 47.89% and 17.16% of variance in the <sup>1</sup>H  
404 NMR data, respectively, but showed little clustering by clade (Fig. 4a). Permutational  
405 multivariate analyses of variance were not significant for combinations of neither PC 1 & 2 ( $P =$   
406 0.635) nor 3 & 4 ( $P = 0.445$ ), suggesting that different clades do not form distinct clusters in  
407 chemospace based on their <sup>1</sup>H NMR spectra.

408 According to the MRM models, both patristic distance and Abouheif's proximity  
409 significantly predict a small proportion of variation in chemical distance calculated among *Piper*  
410 samples from all clades (patristic:  $\beta = -6400.217$ ,  $R^2 = 0.002$ ,  $P = 0.005$ ; Abouheif:  $\beta = -8.673$ ,  
411  $R^2 = 0.003$ ,  $P = 0.001$ ) and among *Radula* samples only (patristic:  $\beta = -5480.108$ ,  $R^2 = 0.004$ ,  $P =$   
412 0.003; Abouheif:  $\beta = -6.456$ ,  $R^2 = 0.002$ ,  $P = 0.005$ ) (Fig. 4bc). Though explained variance is  
413 small, the slope coefficients for these significant relationships are negative, indicating that  
414 decreasing phylogenetic distance is associated with increasing chemical distance.

415 Analyses with the generalized  $K$  statistic ( $K_{\text{mult}}$ ; Adams, 2014) indicated lower levels of  
416 phylogenetic signal in the metabolomic data than expected under a Brownian motion model of  
417 evolution for *Piper* generally ( $K_{\text{mult}} = 0.1606$ ,  $P = 0.001$ ) and for *Radula* specifically ( $K_{\text{mult}} =$   
418 0.1803,  $P = 0.001$ ). Still, the observed  $K_{\text{mult}}$  was higher than all  $K_{\text{mult}}$  values obtained with  
419 permutations of the <sup>1</sup>H NMR dataset (Fig. S1). Additionally, few  $K_{\text{mult}}$  tests of the permuted data  
420 yielded significant  $P$ -values (4.4% of permutations), indicating that the estimate we observed,

421 though subtle and lower than Brownian motion expectations, was real and not a statistical artifact  
422 of zero-inflation in the data.

423

## 424 **Discussion**

425 *Piper* is a hyper-diverse lineage in which phytochemical variation has influenced  
426 evolutionary and ecological processes and shaped complex tropical communities (e.g., Salazar *et al.*  
427 *et al.*, 2016; Richards *et al.*, 2018). However, there have been limitations in both the degree of  
428 phylogenetic resolution and the understanding of phytochemical variation in this group.  
429 Phylogenies inferred here with ddRADseq data substantially improved resolution and support  
430 compared to past studies of *Piper*, which were limited by interspecific variation in small  
431 numbers of Sanger-sequenced loci (Jaramillo *et al.*, 2008; Smith *et al.*, 2008; Martínez *et al.*,  
432 2015). Although the data set did not include members from all previously recognized groups,  
433 analyses resolved eight monophyletic Neotropical *Piper* clades, six of which have been inferred  
434 in previous analyses of the genus based on chloroplast psbJ-petA and ITS (Jaramillo *et al.*, 2008;  
435 Martínez *et al.*, 2015). Two of the eight clades, Churumayu and Isophyllon, had been previously  
436 nested within *Radula* (Jaramillo *et al.*, 2008); however, our results suggest that they are  
437 independent monophyletic lineages (Fig. 1). Despite low support for several deep divergences,  
438 the phylogeny inferred here had strong resolution and support for recent relationships, including  
439 within *Radula* (Fig. 1), consistent with other recent reduced representation sequencing studies  
440 that have generated high quality phylogenies at shallow time scales (Massati *et al.*, 2016; Eaton  
441 *et al.*, 2017; Lecaudey *et al.*, 2018; Paetzold *et al.*, 2019). However, a potential limitation of such  
442 sequencing designs may include the recovery of fewer loci shared by more distantly related  
443 samples due to allelic dropout (Cariou *et al.* 2013; Cooke *et al.*, 2016). It is possible that allelic  
444 dropout, potentially exacerbated by strict filtering of missing data, led to weak support values for  
445 deep splits in the phylogeny, many of which occurred early in the history of the Neotropical  
446 *Piper* lineage (Martínez *et al.* 2015). Nonetheless, the resulting subset of data (641 loci; 9,113  
447 SNPs) was sufficient for inferring a largely resolved phylogeny, highlighting the potential  
448 promise of reduced representation sequencing for resolving evolutionary histories even in groups  
449 spanning moderately deep divergence.

450 Comparative studies have taken diverse approaches to analyzing metabolomic data, each  
451 providing a unique perspective on the evolution of specialized metabolites (e.g., Salazar *et al.*,

452 2018; Sedio *et al.*, 2018, 2019; Ernst *et al.* 2019; Kang *et al.* 2019). Here, we first characterized  
453 the presence/absence of 35 metabolite classes commonly used to categorize plant secondary  
454 compounds that are hierarchically nested into three levels of structural resolution. Specific  
455 categories at the lowest level of the hierarchy, representing specialized structural motifs or  
456 specific molecules, were rare across species and precluded tests of phylogenetic signal at our  
457 level of taxonomic sampling (Fig. 2). Despite not being able to test for phylogenetic signal,  
458 clustering is evident for more specific categories, such as crassinervic acid and prenylated  
459 flavonoids, which are only present in small subclades but include particularly effective defenses  
460 (Dyer & Palmer, 2004; Salehi *et al.*, 2019). Alternatively, broader metabolite classes at  
461 intermediate and high positions in the hierarchy that are directly tied to fundamental secondary  
462 metabolite biosynthetic pathways were more abundant across species and exhibited moderate-  
463 high levels of phylogenetic signal across *Radula* (Table 1, Fig. 2). This pattern may be expected  
464 if initial biosynthetic steps are conserved over longer evolutionary scales, permitting the  
465 abundance of broad chemical classes, yet later stage modifications of these core structures are  
466 more evolutionarily labile, causing structural similarity to be low even among related species.  
467 Flavonoids are a good example of this pattern, with pathways that form the flavonoid scaffold  
468 being very conserved, as they are catalyzed by modified enzymes from ubiquitous metabolic  
469 pathways, but then subsequent biosynthetic steps (e.g., those catalyzed by p450 enzymes) modify  
470 these scaffolds (Yonekura-Sakakibara *et al.*, 2019), yielding unique molecules towards the tips  
471 of evolutionary trees (Fig. 3E). For example, late-stage modification of common flavonoid  
472 scaffolds can result in the production of non-aromatic protoflavanoids. These compounds rarely  
473 occur across the plant kingdom and have only recently been found in one species of *Piper*  
474 (Freitas *et al.*, 2014). Importantly, this subtle structural modification that leaves most of the  
475 flavonoid scaffold intact has been demonstrated to dramatically enhance the cytotoxic properties  
476 compared to that of the parent flavonoid (Hunyadi *et al.*, 2014; Latif *et al.*, 2020).

477 One key prediction from the escape and radiate hypothesis is that adaptive defensive  
478 traits should be phylogenetically conserved within the lineage they evolved, but this prediction  
479 has mostly been evaluated with broad classes of secondary metabolites at high taxonomic scales  
480 (e.g., Ehrlich & Raven, 1964; Moreira *et al.*, 2018; Yonekura-Sakakibara *et al.*, 2019; Zhang *et*  
481 *al.*, 2020) rather than specific compounds in recent diversifications (e.g., Agrawal *et al.*, 2009;  
482 Salazar *et al.*, 2018; Allevato *et al.*, 2019). A growing number of studies conducted at shallower



483 evolutionary scales suggest chemical traits may be evolutionarily labile and highlight the need  
484 for determining the level at which chemical defense is conserved, and which compound classes  
485 are more likely to exhibit phylogenetic signal and evolutionary correlations (Kursar *et al.*, 2009;  
486 Sedio, 2013; Johnson *et al.*, 2014; Salazar *et al.*, 2016; Maldonado *et al.*, 2017; Moreira *et al.*,  
487 2018). Further, an understanding of the phylogenetic scale of chemical trait conservation will  
488 enable insights into the drivers of herbivorous insect radiations, as the nature of codiversification  
489 in many of these lineages is likely structured by complex associations between geology,  
490 geography, chemical defense, and biotic interactions (Endara *et al.* 2017; Jahner *et al.* 2017). Our  
491 results are generally consistent with the predictions of signal (and conservatism) for broad  
492 classes of compounds, as well as the lack of signal for specific structures captured by  $^1\text{H}$  NMR  
493 data.

494         The  $^1\text{H}$  NMR data address a different set of hypotheses than data from categorization of  
495 individual molecules – peaks represent resonances associated with particular molecular  
496 structures rather than individual compounds, and the chemical shift (frequency), shape, and  
497 abundance of these resonances are extremely sensitive to subtle structural changes.  $^1\text{H}$  NMR  
498 spectroscopy easily detects a great range and subtle differences in compositional and structural  
499 complexity, including increasing size, asymmetry and oxidation states, that might be predicted to  
500 evolve in response to divergent selection across plant populations responding to different suites  
501 of enemies (Dyer *et al.*, 2018). Low levels of phylogenetic signal in the  $^1\text{H}$  NMR data and  
502 evidence for phylogenetic overdispersion (Fig. 4) is also likely due to the fact that many  
503 molecular features of small defensive molecules have potentially evolved in a convergent  
504 manner across *Piper*, such as the kavalactones, *p*-alkenyl phenols, piplartine, oxidized prenylated  
505 benzoic acids, chromanes, anuramide peptides, and phenethyl amides.

506         There are numerous limitations that could affect estimates of phylogenetic signal in  
507 comparative studies (reviewed by Kamilar & Cooper, 2013) that are relevant to the analyses  
508 presented here. First, incomplete taxon sampling and unresolved tree structure can substantially  
509 influence tests of phylogenetic signal and likely influenced our results to some degree. However,  
510 we made great effort to sample species from across the entire known phylogeny of *Radula* to  
511 reduce sampling bias, and more comprehensive genomic sampling produced enhanced  
512 phylogenetic resolution of the *Radula* clade, where we focused the majority of phylogenetic  
513 comparative methods. In addition, we were unable to quantify the measurement error associated

514 with the chemical traits within species (e.g., Johnson *et al.*, 2014), which can decrease the  
515 statistical power for detecting phylogenetic signal (Blomberg *et al.*, 2003; Ives *et al.*, 2007;  
516 Hardy & Pavoine, 2012). It is also possible that environmental effects on our chemical traits  
517 could bias estimates of phylogenetic signal and correlations (Ives *et al.*, 2007).

518         The causes of correlated evolution, including linkage, epistasis, and selection, are  
519 difficult to detect without careful approaches in quantitative genetics and population genomics.  
520 Nevertheless, one advantage of examining the presence/absence of multiple classes of defensive  
521 compounds in a phylogenetic context is that it is possible to test for expected patterns of  
522 correlated evolution due to shared metabolic pathways (e.g., flavonoids and cardenolides;  
523 Agrawal *et al.*, 2009) or due to adaptive advantages of specific mixtures. Recent studies  
524 detecting evolutionary associations among chemical traits (Johnson *et al.*, 2014; Kariñho-  
525 Betancourt *et al.*, 2015; Boachon *et al.*, 2018) have posited that the branching structure of  
526 metabolic pathways could potentially drive this pattern. If metabolite classes share a common  
527 precursor, one might expect evolutionary tradeoffs and negative covariation. Alternatively, if  
528 metabolite classes lie along the same metabolic pathway, an increase in one class may be  
529 concomitant with increases in another (or vice versa) causing positive covariation among the  
530 classes. There are also numerous empirical examples supporting the hypotheses that positive  
531 correlations may be driven by functional redundancy (Jones & Firn, 1991; Romeo *et al.*, 2013) or  
532 selection for synergistic effects on herbivores (Dyer *et al.*, 2003; Richards *et al.*, 2010) rather  
533 than the structural constraints of metabolism. Suites of covarying defensive traits, or defense  
534 syndromes, have been detected in several plant genera (Becerra *et al.* 2001; Agrawal & Fishbein,  
535 2006; Endara *et al.* 2017) and plant communities (Kursar & Coley, 2003), and have been  
536 predominantly used to describe covariation among mechanical and chemical defenses. It is  
537 interesting to note the correlated evolution of the flavones/chalcones and the *p*-alkenyl  
538 phenols/kavalactones could be due to metabolic constraints, as well as possible adaptations via  
539 synergistic (e.g., kavalactones in *P. methysticum*) or other mixture-associated defensive attributes  
540 (reviewed in Dyer *et al.*, 2018). Flavonoids and chalcones are directly linked biosynthetically,  
541 such that the inherent reactivity of the chalcone moiety permits the enzymatic processes that  
542 result in cyclization to the flavonoid scaffold (Fig. 3E). This strong biosynthetic tie predicts the  
543 presence of one would depend on the other, and indeed our structural analysis found many cases  
544 where both metabolite classes co-occurred in the same sample. Revealing the relationship

545 between the kavalactones and *p*-alkenyl phenols is more tenuous because both classes are less  
546 prevalent across our samples. Kavalactones and *p*-alkenyl phenols are dramatically different  
547 compounds that diverge at a much earlier branch point from a common cinnamic/coumaric acid  
548 precursor. Whereas one polyacetate chain extension pathway leads to the long-chain lipophilic  
549 substituent, characteristic of the *p*-alkenyl phenols, the other chain extension pathway conserves  
550 oxidation states through the chain extension process to produce the lactones (kavalactones or  
551 butenolides) through cyclization reactions (Fig. 3E). The overall outcome is different than the  
552 chalcone-flavonoid relationship; in this case, two dramatically different compounds are produced  
553 by divergence from a common early-stage biosynthetic precursor in contrast to the immediate  
554 biosynthetic precursor relationship between chalcones and flavonoids. Broader sampling across  
555 *Piper* and *Radula* will be necessary to confirm this unexpected relationship between  
556 kavalactones and *p*-alkenyl phenols.

557

## 558 **Conclusion**

559 Here we sought to advance understanding of phylogenetic relationships within *Piper*  
560 while simultaneously investigating the mode and manner of phytochemical evolution in this  
561 group. In addition to generating a well-resolved phylogeny, our results support theoretical  
562 expectations that broad classes of compounds display higher degrees of phylogenetic  
563 conservatism than the more evolutionarily labile molecular features revealed by <sup>1</sup>H NMR data. In  
564 addition, trait associations observed in *Radula* can be used to pose functional hypotheses about  
565 genetic constraints or biases on phytochemical evolution and how these factors structure plant-  
566 animal interactions. Such investigations are one of the emerging frontiers in terrestrial ecology,  
567 and we hope that our study provides one example of how collaborative and multi-disciplinary  
568 research can progress in this area.

569

## 570 **Acknowledgements**

571 This research was funded by the National Science Foundation (DEB-1145609 and DEB-  
572 1442103) to CJ, LAD, LAR, MLF, TLP, and AMS, by the National Science Foundation  
573 Graduate Research Award (Award No. 1650114) to KAU, and by FAPESP (Award No  
574 2014/50316-7) to MJK. Fellowship support for KAU, KMO, and CSP and funding for chemical  
575 instrumentation and analysis was provided by the Hitchcock Center for Chemical Ecology at the

576 University of Nevada, Reno. We thank Jennifer L. McCracken for her assistance with the  
577 collection of GC-MS data for the categorical chemical characterization, and we thank Chris  
578 Feldman, Beth Leger, and Steve Vander Wall for their guidance during the earliest stages of this  
579 project.

580

### 581 **Author contributions**

582 MLF, LAD, AMS, CSJ, LAR, and TLP developed the original idea for the research and secured  
583 funding. EJT, MJK, and LFY collected specimens. EJT extracted DNA from plant specimens.  
584 KAU and TLP generated genotyping-by-sequencing libraries. KAU and JPJ analyzed the genetic  
585 data. KMO and LAR performed chemical extractions and analyses. CSJ, CSP, and CDD  
586 executed chemical annotation and structure determination. KAU and JPJ wrote the first draft of  
587 the manuscript, and all authors contributed to subsequent revisions.

588

### 589 **ORCID**

|                            |                                                                                           |
|----------------------------|-------------------------------------------------------------------------------------------|
| 590 Kathryn A. Uckele      | <a href="https://orcid.org/0000-0002-2714-4050">https://orcid.org/0000-0002-2714-4050</a> |
| 591 Joshua P. Jahner       | <a href="https://orcid.org/0000-0001-8121-6783">https://orcid.org/0000-0001-8121-6783</a> |
| 592 Eric J. Tepe           | <a href="https://orcid.org/0000-0002-8493-0736">https://orcid.org/0000-0002-8493-0736</a> |
| 593 Lora A. Richards       | <a href="https://orcid.org/0000-0002-8052-4378">https://orcid.org/0000-0002-8052-4378</a> |
| 594 Lee A. Dyer            | <a href="https://orcid.org/0000-0002-0867-8874">https://orcid.org/0000-0002-0867-8874</a> |
| 595 Casey S. Philbin       | <a href="https://orcid.org/0000-0001-9782-5356">https://orcid.org/0000-0001-9782-5356</a> |
| 596 Massuo J. Kato         | <a href="https://orcid.org/0000-0002-3315-2129">https://orcid.org/0000-0002-3315-2129</a> |
| 597 Lydia F. Yamaguchi     | <a href="https://orcid.org/0000-0003-2305-8208">https://orcid.org/0000-0003-2305-8208</a> |
| 598 Matthew L. Forister    | <a href="https://orcid.org/0000-0003-2765-4779">https://orcid.org/0000-0003-2765-4779</a> |
| 599 Angela M. Smilanich    | <a href="https://orcid.org/0000-0002-9519-544X">https://orcid.org/0000-0002-9519-544X</a> |
| 600 Christopher S. Jeffrey | <a href="https://orcid.org/0000-0002-2540-6694">https://orcid.org/0000-0002-2540-6694</a> |
| 601 Thomas L. Parchman     | <a href="https://orcid.org/0000-0003-1771-1514">https://orcid.org/0000-0003-1771-1514</a> |

602

603 **References**

- 604 Abouheif E. 1999. A method for testing the assumption of phylogenetic independence in  
605 comparative data. *Evolutionary Ecology Research* 1: 895–909.
- 606 Adams DC. 2014. A generalized *K* statistic for estimating phylogenetic signal from shape and  
607 other high-dimensional multivariate data. *Systematic Biology* 63: 685–697.
- 608 Adams DC, Otárola-Castillo E. 2013. geomorph: an R package for the collection and analysis of  
609 geometric morphometric shape data. *Methods in Ecology and Evolution* 4: 393–399.
- 610 Agrawal AA. 2007. Macroevolution of plant defense strategies. *Trends in Ecology & Evolution*  
611 22: 103–109.
- 612 Agrawal AA, Fishbein M. 2006. Plant defense syndromes. *Ecology* 87: S132–S149.
- 613 Agrawal AA, Salminen JP, Fishbein M. 2009. Phylogenetic trends in phenolic metabolism of  
614 milkweeds (*Asclepias*): evidence for escalation. *Evolution: International Journal of Organic*  
615 *Evolution* 63: 663–673.
- 616 Allevato DM, Groppo M, Kiyota E, Mazzafera P, Nixon KC. 2019. Evolution of phytochemical  
617 diversity in *Pilocarpus* (Rutaceae). *Phytochemistry* 163:132-146.
- 618 Anderson MJ. 2001. A new method for non-parametric multivariate analysis of variance.  
619 *Austral Ecology* 26: 32-46.
- 620 Andrews KR, Good JM, Miller MR, Luikart G, Hohenlohe PA. 2016. Harnessing the power of  
621 RADseq for ecological and evolutionary genomics. *Nature Reviews Genetics* 17: 81–92.
- 622 Asmarayani R. 2018. Phylogenetic relationships in Malesian–Pacific *Piper* (Piperaceae) and  
623 their implications for systematics. *Taxon* 67: 693-724.
- 624 Bagley JC, Uribe-Convers S, Carlsen MM, Muchhala N. 2020. Utility of targeted sequence  
625 capture for phylogenomics in rapid, recent angiosperm radiations: Neotropical *Burmeistera*  
626 bellflowers as a case study. *Molecular Phylogenetics and Evolution* 152: 106769.
- 627 Becerra JX. 1997. Insects on plants: macroevolutionary chemical trends in host use. *Science* 276:  
628 253–256.
- 629 Becerra JX, Venable D, Evans P, Bowers W. 2001. Interactions between chemical and  
630 mechanical defenses in the plant genus *Bursera* and their implications for herbivores.  
631 *American Zoologist* 41: 865–876.
- 632 Berenbaum M. 1978. Toxicity of a furanocoumarin to armyworms: a case of biosynthetic escape  
633 from insect herbivores. *Science* 201: 532–534.

- 634 Blomberg SP, Garland T, Ives AR. 2003. Testing for phylogenetic signal in comparative data:  
635 behavioral traits are more labile. *Evolution* 57: 717–745.
- 636 Boachon B, Buell CR, Crisovan E, Dudareva N, Garcia N, Godden G, Henry L, Kamileen MO,  
637 Kates HR, Kilgore MB et al. 2018. Phylogenomic mining of the mints reveals multiple  
638 mechanisms contributing to the evolution of chemical diversity in Lamiaceae. *Molecular*  
639 *Plant* 1: 1084–1096.
- 640 Bowers MD. 1983. The role of iridoid glycosides in host-plant specificity of checkerspot  
641 butterflies. *Journal of Chemical Ecology* 9: 475–493.
- 642 Bowers MD. 1984. Iridoid glycosides and host-plant specificity in larvae of the buckeye  
643 butterfly, *Junonia coenia* (Nymphalidae). *Journal of Chemical Ecology* 10: 1567–1577.
- 644 Callejas-Posada R. 2020. Piperaceae. In: Davidse G, Ulloa Ulloa C, Hernández Macías HM,  
645 Knapp S, eds. *Flora Mesoamericana*, vol. 2, pt. 2 (pp. i–xix; 1–590), St. Louis, MO:  
646 Missouri Botanical Garden Press.
- 647 Cardini A, Elton S. 2008. Does the skull carry a phylogenetic signal? Evolution and modularity  
648 in the guenons. *Biological Journal of the Linnean Society* 93: 813–834.
- 649 Cariou M, Duret L, Charlat S. 2013. Is RAD-seq suitable for phylogenetic inference? An in  
650 silico assessment and optimization. *Ecology and Evolution*. 3:846–852.
- 651 Carter KA, Liston A, Bassil NV, Alice LA, Bushakra JM, Sutherland BL, Mockler TC, Bryant  
652 DW, Hummer KE. 2019. Target capture sequencing unravels *Rubus* evolution. *Frontiers in*  
653 *Plant Science* 10: 1615.
- 654 Caseys C, Stritt C, Glauser G, Blanchard T, Lexer C. 2015. Effects of hybridization and  
655 evolutionary constraints on secondary metabolites: the genetic architecture of  
656 phenylpropanoids in European *Populus* species. *PloS one* 10: e0128200.
- 657 Chen F, Tholl D, Bohlmann J, Pichersky E. 2011. The family of terpene synthases in plants: a  
658 midsize family of genes for specialized metabolism that is highly diversified throughout the  
659 kingdom. *The Plant Journal* 66: 212–229.
- 660 Clavel J, Escarguel G, Merceron G. 2015. mvmorph: an R package for fitting multivariate  
661 evolutionary models to morphometric data. *Methods in Ecology and Evolution* 6: 1311–1319.
- 662 Colby S, Alonso W, Katahira E, McGarvey D, Croteau R. 1993. 4s-limonene synthase from the  
663 oil glands of spearmint (*Mentha spicata*). cDNA isolation, characterization, and bacterial

- 664 expression of the catalytically active monoterpene cyclase. *Journal of Biological Chemistry*  
665 268: 23016–23024.
- 666 Cooke TF, Yee MC, Muzzio M, Sockell A, Bell R, Cornejo OE, Kelley JL, Bailliet G, Bravi  
667 CM, Bustamante CD, Kenny EE. 2016. GBStools: a statistical method for estimating allelic  
668 dropout in reduced representation sequencing data. *PLoS Genetics* 12: e1005631.
- 669 Du ZY, Harris AJ, Xiang QYJ. 2020. Phylogenomics, co-evolution of ecological niche and  
670 morphology, and historical biogeography of buckeyes, horsechestnuts, and their relatives  
671 (Hippocastaneae, Sapindaceae) and the value of RAD-seq for deep evolutionary inferences  
672 back to the Late Cretaceous. *Molecular Phylogenetics and Evolution* 145: 106726.
- 673 Dyer LA, Dodson CD, Stireman JO, Tobler MA, Smilanich AM, Fincher RM, Letourneau DK.  
674 2003. Synergistic effects of three *Piper* amides on generalist and specialist herbivores.  
675 *Journal of Chemical Ecology* 29: 2499–2514.
- 676 Dyer LA, Palmer AD. 2004. *Piper: a model genus for studies of phytochemistry, ecology, and*  
677 *evolution*. New York, NY: Kluwer Academic/Plenum Publishers.
- 678 Dyer LA, Philbin CS, Ochsenrider KM, Richards LA, Massad TJ, Smilanich AM, Forister ML,  
679 Parchman TL, Galland LM, Hurtado PJ, et al. 2018. Modern approaches to study plant–insect  
680 interactions in chemical ecology. *Nature Reviews Chemistry* 2: 50–64.
- 681 Dyer LA, Richards J, Dodson CD. 2004. Isolation, synthesis, and evolutionary ecology of *Piper*  
682 amides. In: Dyer LA, Palmer AD, eds. *Piper: A model genus for studies of phytochemistry,*  
683 *ecology, and evolution*. City, State: Springer, 117–139.
- 684 Easson CG, Thacker RW. 2014. Phylogenetic signal in the community structure of host-specific  
685 microbiomes of tropical marine sponges. *Frontiers in Microbiology* 5: 532.
- 686 Eaton DA. 2014. PyRAD: assembly of *de novo* RADseq loci for phylogenetic analyses.  
687 *Bioinformatics* 30: 1844–1849.
- 688 Eaton DA, Ree RH. 2013. Inferring phylogeny and introgression using RADseq data: an  
689 example from flowering plants (*Pedicularis*: Orobanchaceae). *Systematic Biology* 62: 689–  
690 706.
- 691 Eaton DA, Spriggs EL, Park B, Donoghue MJ. 2017. Misconceptions on missing data in RAD-  
692 seq phylogenetics with a deep-scale example from flowering plants. *Systematic Biology* 66:  
693 399–412.

- 694 Edgar RC. 2004. MUSCLE: multiple sequence alignment with high accuracy and high  
695 throughput. *Nucleic Acids Research* 32: 1792–1797.
- 696 Ehrlich PR, Raven PH. 1964. Butterflies and plants: a study in coevolution. *Evolution* 18: 586–  
697 608.
- 698 Endara MJ, Coley PD, Ghabash G, Nicholls JA, Dexter KG, Donoso DA, Stone GN, Pennington  
699 RT, Kursar TA. 2017. Coevolutionary arms race versus host defense chase in a tropical  
700 herbivore-plant system. *Proceedings of the National Academy of Sciences USA* 114: E7499-  
701 E7505.
- 702 Ernst M, Nothias LF, van der Hooft JJJ, Silva RR, Saslis-Lagoudakis CH, Grace OM, Martinez-  
703 Swatson K, Hassemer G, Funez LA, Simonsen HT, et al. 2019. Assessing specialized  
704 metabolite diversity in the cosmopolitan plant genus *Euphorbia* L. *Frontiers in Plant Science*  
705 10: 846.
- 706 Felsenstein J. 1985. Phylogenies and the comparative method. *The American Naturalist* 125: 1–  
707 15.
- 708 Fernández-Mazuecos M, Mellers G, Vigalondo B, Sáez L, Vargas P, Glover BJ. 2017. Resolving  
709 recent plant radiations: power and robustness of genotyping-by-sequencing. *Systematic*  
710 *Biology* 67: 250-268.
- 711 Fine PVA, Miller ZJ, Mesones I, Irazuzta S, Appel HM, Stevens MHH, Sääksjärvi I, Schultz JC,  
712 Coley PD. 2006. The growth–defense trade-off and habitat specialization by plants in  
713 Amazonian forests. *Ecology* 87: S150–S162.
- 714 Freitas GC, Batista Jr JM, Franchi Jr GC, Nowill AE, Yamaguchi LF, Vilcachagua JD, Favaro  
715 DC, Furlan M, Guimarães EF, Jeffrey CS, Kato MJ. 2014. Cytotoxic non-aromatic B-ring  
716 flavanones from *Piper carniconnectivum* C. DC. *Phytochemistry* 97: 81–87.
- 717 Fritz SA, Purvis A. 2010. Selectivity in mammalian extinction risk and threat types: a new  
718 measure of phylogenetic signal strength in binary traits. *Conservation Biology* 24:1042–  
719 1051.
- 720 Fukushima A, Kusano M, Redestig H, Arita M, Saito K. 2011. Metabolomic correlation-network  
721 modules in *Arabidopsis* based on a graph-clustering approach. *BMC Systems Biology* 5: 1.
- 722 Gentry AH. 1993. *Four neotropical rainforests*. New Haven, CT: Yale University Press.
- 723 Glassmire AE, Jeffrey CS, Forister ML, Parchman TL, Nice CC, Jahner JP, Wilson JS, Walla  
724 TR, Richards LA, Smilanich AM, Leonard MD. 2016. Intraspecific phytochemical variation



- 725 shapes community and population structure for specialist caterpillars. *New Phytologist* 212:  
726 208–219.
- 727 Goslee SC, Urban DL. 2007. The ecodist package for dissimilarity-based analysis of ecological  
728 data. *Journal of Statistical Software* 22: 1–19.
- 729 Griffin WJ, Lin GD. 2000. Chemotaxonomy and geographical distribution of tropane alkaloids.  
730 *Phytochemistry* 53: 623–637.
- 731 Hamon P, Grover CE, Davis AP, Rakotomalala J-J, Raharimalala NE, Albert VA, Sreenath HL,  
732 Stoffelen P, Mitchell SE, Couturon E, et al. 2017. Genotyping-by-sequencing provides the  
733 first well-resolved phylogeny for coffee (*Coffea*) and insights into the evolution of caffeine  
734 content in its species. *Molecular Phylogenetics and Evolution* 109: 351–361.
- 735 Hardy OJ, Pavoine S. 2012. Assessing phylogenetic signal with measurement error: a  
736 comparison of Mantel tests, Blomberg et al.’s *K*, and phylogenetic distograms. *Evolution:  
737 International Journal of Organic Evolution* 66: 2614–2621.
- 738 Harmon LJ, Glor RE. 2010. Poor statistical performance of the Mantel test in phylogenetic  
739 comparative analyses. *Evolution: International Journal of Organic Evolution* 64: 2173–2178.
- 740 Herrera S, Shank TM. 2016. RAD sequencing enables unprecedented phylogenetic resolution  
741 and objective species delimitation in recalcitrant divergent taxa. *Molecular Phylogenetics  
742 and Evolution* 100: 70–79.
- 743 Hipp AL, Manos PS, Hahn M, Avishai M, Bodénès C, Cavender-Bares J, Crowl AA, Deng M,  
744 Denk T, Fitz-Gibbon S, Gailing O. 2020. Genomic landscape of the global oak phylogeny.  
745 *New Phytologist* 226: 1198–1212.
- 746 Höhna S, Landis MJ, Heath TA, Boussau B, Lartillot N, Moore BR, Huelsenbeck JP, Ronquist  
747 F. 2016. RevBayes: Bayesian phylogenetic inference using graphical models and an  
748 interactive model-specification language. *Systematic Biology* 65: 726–736.
- 749 Hunyadi A, Martins A, Danko B, Chang FR, Wu YC. 2014. Protoflavones: A class of unusual  
750 flavonoids as promising novel anticancer agents. *Phytochemistry Reviews* 13: 69–77.
- 751 Ives AR, Midford PE, Garland Jr T. 2007. Within-species variation and measurement error in  
752 phylogenetic comparative methods. *Systematic Biology* 56: 252–270.
- 753 Jahner JP, Forister ML, Parchman TL, Smilanich AM, Miller JS, Wilson JS, Walla TR, Tepe EJ,  
754 Richards LA, Quijano-Abril MA, et al. 2017. Host conservatism, geography, and elevation in  
755 the evolution of a Neotropical moth radiation. *Evolution* 71: 2885–2900.

- 756 Janz N. 2011. Ehrlich and Raven revisited: mechanisms underlying codiversification of plants  
757 and enemies. *Annual Review of Ecology, Evolution, and Systematics* 42: 71–89.
- 758 Jaramillo MA, Callejas R, Davidson C, Smith JF, Stevens AC, Tepe EJ. 2008. A phylogeny of  
759 the tropical genus *Piper* using ITS and the chloroplast intron psbJ–petA. *Systematic Botany*  
760 33: 647–660.
- 761 Johnson MT, Agrawal AA, Maron JL, Salminen JP. 2009. Heritability, covariation and natural  
762 selection on 24 traits of common evening primrose (*Oenothera biennis*) from a field  
763 experiment. *Journal of Evolutionary Biology* 22: 1295–1307.
- 764 Johnson MT, Ives AR, Ahern J, Salminen JP. 2014. Macroevolution of plant defenses against  
765 herbivores in the evening primroses. *New Phytologist* 203: 267–279.
- 766 Jombart T, Devillard S, Balloux F. 2010. Discriminant analysis of principal components: a new  
767 method for the analysis of genetically structured populations. *BMC Genetics* 11: 94.
- 768 Jones CG, Firth RD. 1991. On the evolution of plant secondary chemical diversity. *Philosophical*  
769 *Transactions of the Royal Society of London. Series B: Biological Sciences* 333: 273–280.
- 770 Jost L. 2006. Entropy and diversity. *Oikos* 113: 363–375.
- 771 Kamilar JM, Cooper N. 2013. Phylogenetic signal in primate behaviour, ecology and life history.  
772 *Philosophical Transactions of the Royal Society B: Biological Sciences* 368: 20120341.
- 773 Kang KB, Ernst M, van der Hooft JJJ, da Silva RR, Park J, Medema MH, Sung SH, Dorrestein  
774 PC. 2019. Comprehensive mass spectrometry-guided phenotyping of plant specialized  
775 metabolites reveals metabolic diversity in the cosmopolitan plant family Rhamnaceae. *The*  
776 *Plant Journal* 98: 1134–1144.
- 777 Kariñho-Betancourt E, Agrawal AA, Halitschke R, Núñez-Farfán J. 2015. Phylogenetic  
778 correlations among chemical and physical plant defenses change with ontogeny. *New*  
779 *Phytologist* 206: 796–806.
- 780 Kato MJ, Furlan M. 2007. Chemistry and evolution of the Piperaceae. *Pure and Applied*  
781 *Chemistry* 79: 529–538.
- 782 Klingenberg CP, Gidaszewski NA. 2010. Testing and quantifying phylogenetic signals and  
783 homoplasy in morphometric data. *Systematic Biology* 59: 245–261.
- 784 Kursar TA, Coley PD. 2003. Convergence in defense syndromes of young leaves in tropical  
785 rainforests. *Biochemical Systematics and Ecology* 31: 929–949.

- 786 Kursar TA, Dexter KG, Lokvam J, Pennington RT, Richardson JE, Weber MG, Murakami ET,  
787 Drake C, McGregor R, Coley PD. 2009. The evolution of antiherbivore defenses and their  
788 contribution to species coexistence in the tropical tree genus *Inga*. *Proceedings of the*  
789 *National Academy of Sciences* 106: 18073–18078.
- 790 Langmead B, Salzberg SL. 2012. Fast gapped-read alignment with Bowtie 2. *Nature methods* 9:  
791 357-359.
- 792 Latif AD, Jernei T, Podolski-Renić A, Kuo CY, Vágvölgyi M, Girst G, Zupkó I, Develi S,  
793 Ulukaya E, Wang HC, Pešić M, Csámpai A and Hunyadi A. 2020. Protoflavone-chalcone  
794 hybrids exhibit enhanced antitumor action through modulating redox balance, depolarizing  
795 the mitochondrial membrane, and inhibiting ATR-dependent signaling. *Antioxidants* 9: 1–18.
- 796 Leaché AD, Oaks JR. 2017. The utility of single nucleotide polymorphism (SNP) data in  
797 phylogenetics. *Annual Review of Ecology, Evolution, and Systematics* 48: 69-84.
- 798 Lecaudey LA, Schliewen UK, Osinov AG, Taylor EB, Bernatchez L, Weiss SJ. 2018. Inferring  
799 phylogenetic structure, hybridization and divergence times within Salmoninae (Teleostei:  
800 Salmonidae) using RAD-sequencing. *Molecular Phylogenetics and Evolution* 124: 82-99.
- 801 Lèveillé-Bourret É, Chen BH, Garon-Labrecque MÉ, Ford BA, Starr JR. 2020. RAD sequencing  
802 resolves the phylogeny, taxonomy and biogeography of Trichophoreae despite a recent rapid  
803 radiation (Cyperaceae). *Molecular Phylogenetics and Evolution* 145: 106727.
- 804 Malcolm SB. 1994. Milkweeds, monarch butterflies and the ecological significance of  
805 cardenolides. *Chemoecology* 5: 101–117.
- 806 Maldonado C, Barnes CJ, Cornett C, Holmfred E, Hansen SH, Persson C, Antonelli A, Rønsted  
807 N. 2017. Phylogeny predicts the quantity of antimalarial alkaloids within the iconic yellow  
808 Cinchona bark (Rubiaceae: *Cinchona calisaya*). *Frontiers in Plant Science* 8: 391.
- 809 Maron JL, Agrawal AA, Schemske DW. 2019. Plant-herbivore coevolution and plant speciation.  
810 *Ecology* 100: e02704.
- 811 Martínez C, Carvalho MR, Madriñán S, Jaramillo CA. 2015. A late Cretaceous *Piper*  
812 (Piperaceae) from Colombia and diversification patterns for the genus. *American Journal of*  
813 *Botany* 102: 273–289.
- 814 Massatti R, Reznicek AA, Knowles LL. 2016. Utilizing RADseq data for phylogenetic analysis  
815 of challenging taxonomic groups: A case study in *Carex* sect. *Racemosae*. *American Journal*  
816 *of Botany* 103: 337–347.

- 817 Mithöfer A, Boland W. 2012. Plant defense against herbivores: chemical aspects. *Annual Review*  
818 *of Plant Biology* 63: 431–450.
- 819 Molina-Henao YF, Guerrero-Chacón AL, Jaramillo MA. 2016. Ecological and geographic  
820 dimensions of diversification in *Piper* subgenus *Ottonia*: A lineage of Neotropical rainforest  
821 shrubs. *Systematic Botany* 41: 253–262.
- 822 Moreira X, Abdala-Roberts L, Galmán A, Francisco M, de la Fuente M, Butrón A, Rasmann S.  
823 2018. Assessing the influence of biogeographical region and phylogenetic history on  
824 chemical defences and herbivory in *Quercus* species. *Phytochemistry* 153: 64–73.
- 825 Oksanen J, Blanchet FG, Kindt R, Legendre P, Minchin PR, O’hara RB, Simpson GL, Solymos  
826 P, Stevens MH, Wagner H, Oksanen MJ. 2013. Package ‘vegan’. *Community Ecology*  
827 Package, version 2: 1–295.
- 828 Orme D, Freckleton R, Thomas G, Petzoldt T, Fritz S, Isaac N, Pearse W. 2018. Caper:  
829 comparative analyses of phylogenetics and evolution in R. *R package version 1.0.1*.  
830 <https://CRAN.R-project.org/package=caper>
- 831 Paetzold C, Wood KR, Eaton D, Wagner WL, Appelhans MS. 2019. Phylogeny of Hawaiian  
832 *Melicope* (Rutaceae): RAD-Seq resolves species relationships and reveals ancient  
833 introgression. *Frontiers in Plant Science* 10: 1074
- 834 Pagel, M. 1994. Detecting correlated evolution on phylogenies: a general method for the  
835 comparative analysis of discrete characters. *Proceedings of the Royal Society of London.*  
836 *Series B: Biological Sciences* 255: 37–45.
- 837 Paradis E, Claude J, Strimmer K. 2004. APE: Analyses of Phylogenetics and Evolution in R  
838 language. *Bioinformatics* 20: 289–290.
- 839 Parchman TL, Gompert Z, Mudge J, Schilkey F, Benkman CW, Buerkle CA. 2012. Genome-  
840 wide association genetics of an adaptive trait in lodgepole pine. *Molecular Ecology* 21:  
841 2991–3005.
- 842 Parchman TL, Jahner JP, Uckele KA, Galland LM, Eckert AJ. 2018. RADseq approaches and  
843 applications for forest tree genetics. *Tree Genetics & Genomes* 14: 39.
- 844 Parmar VS, Jain SC, Bisht KS, Jain R, Taneja P, Jha A, Tyagi OD, Prasad AK, Wengel J, Olsen  
845 CE, Boll PM. 1997. Phytochemistry of the genus *Piper*. *Phytochemistry* 46: 597–673.
- 846 Pavoine S, Ollier S, Pontier D, Chessel D. 2008. Testing for phylogenetic signal in phenotypic  
847 traits: new matrices of phylogenetic proximities. *Theoretical population biology* 73: 79–91.

- 848 Peterson BK, Weber JN, Kay EH, Fisher HS, Hoekstra HE. 2012. Double digest RADseq: an  
849 inexpensive method for *de novo* SNP discovery and genotyping in model and non-model  
850 species. *PLoS ONE* 7: e37135.
- 851 R Core Team. 2020. R: A language and environment for statistical computing. R Foundation for  
852 Statistical Computing, Vienna, AT. <https://www.R-project.org/>.
- 853 Rambaut A, Drummond AJ, Xie D, Baele G, Suchard MA. 2018. Posterior summarization in  
854 Bayesian phylogenetics using Tracer 1.7. *Systematic Biology* 67: 901–904.
- 855 Rasmann S, Agrawal AA. 2011. Latitudinal patterns in plant defense: evolution of cardenolides,  
856 their toxicity and induction following herbivory. *Ecology Letters* 14: 476–483.
- 857 Revell LJ. 2012. phytools: an R package for phylogenetic comparative biology (and other  
858 things). *Methods in Ecology and Evolution* 3: 217–223.
- 859 Richards LA, Dyer LA, Forister ML, Smilanich AM, Dodson CD, Leonard MD, Jeffrey CS.  
860 2015. Phytochemical diversity drives plant–insect community diversity. *Proceedings of the*  
861 *National Academy of Sciences* 112: 10973–10978.
- 862 Richards LA, Dyer LA, Smilanich AM, Dodson CD. 2010. Synergistic effects of amides from  
863 two *Piper* species on generalist and specialist herbivores. *Journal of Chemical Ecology* 36:  
864 1105–1113.
- 865 Richards LA, Glassmire AE, Ochsenrider KM, Smilanich AM, Dodson CD, Jeffrey CS, Dyer  
866 LA. 2016. Phytochemical diversity and synergistic effects on herbivores. *Phytochemistry*  
867 *Reviews* 15: 1153–1166.
- 868 Richards LA, Lampert EC, Bowers MD, Dodson CD, Smilanich AM, Dyer LA. 2012.  
869 Synergistic effects of iridoid glycosides on the survival, development and immune response  
870 of a specialist caterpillar, *Junonia coenia* (Nymphalidae). *Journal of Chemical Ecology* 38:  
871 1276–1284.
- 872 Richards LA, Oliveira C, Dyer LA. 2018. Shedding light on chemically mediated tri-trophic  
873 interactions: A 1h-1H-NMR network approach to identify compound structural features and  
874 associated biological activity. *Frontiers in Plant Science* 9: 1155.
- 875 Rognes T, Flouri T, Nichols B, Quince C, Mahé F. 2016. VSEARCH: a versatile open source  
876 tool for metagenomics. *PeerJ* 4: e2584.
- 877 Romeo JT, Saunders JA, Barbosa P. 2013. *Phytochemical diversity and redundancy in*  
878 *ecological interactions*, vol. 30. Berlin, DE: Springer Science & Business Media.

- 879 Salazar D, Jaramillo MA, Marquis RJ. 2016. Chemical similarity and local community assembly  
880 in the species rich tropical genus *Piper*. *Ecology* 97: 3176–3183.
- 881 Salazar D, Lokvam J, Mesones I, Vásquez P, Zuñiga JMA, de Valpine P, Fine PVA. 2018.  
882 Origin and maintenance of chemical diversity in a species-rich tropical tree lineage. *Nature*  
883 *Ecology & Evolution* 2: 983.
- 884 Salehi B, Zakaria ZA, Gyawali R, Ibrahim SA, Rajkovic J, Shinwari ZK, Khan T, Sharifi-Rad J,  
885 Ozleyen A, Turkdonmez E, Valussi M. 2019. *Piper* species: a comprehensive review on their  
886 phytochemistry, biological activities and applications. *Molecules* 24:1364.
- 887 Sedio BE. 2013. *Trait evolution and species coexistence in the hyperdiverse tropical tree genus*  
888 *Psychotria*. PhD thesis, University of Michigan, Ann Arbor, MI, USA.
- 889 Sedio BE. 2017. Recent breakthroughs in metabolomics promise to reveal the cryptic chemical  
890 traits that mediate plant community composition, character evolution and lineage  
891 diversification. *New Phytologist* 214: 952–958.
- 892 Sedio BE, Parker JD, McMahon SM, Wright SJ. 2018. Comparative foliar metabolomics of a  
893 tropical and a temperate forest community. *Ecology* 99: 2647–2653.
- 894 Sedio BE, Archibold AD, Echeverri JC, Debyser C, Wright SJ. 2019. A comparison of inducible,  
895 ontogenetic, and interspecific sources of variation in the foliar metabolome in tropical trees.  
896 *PeerJ* 7: e7536.
- 897 Smilanich AM, Dyer LA, Chambers JQ, Bowers MD. 2009. Immunological cost of chemical  
898 defence and the evolution of herbivore diet breadth. *Ecology Letters* 12: 612–621.
- 899 Smith JF, Stevens AC, Tepe EJ, Davidson C. 2008. Placing the origin of two species-rich genera  
900 in the late cretaceous with later species divergence in the tertiary: a phylogenetic,  
901 biogeographic and molecular dating analysis of *Piper* and *Peperomia* (Piperaceae). *Plant*  
902 *Systematics and Evolution* 275: 9.
- 903 Strutzenberger P, Brehm G, Fiedler K. 2012. DNA barcode sequencing from old type specimens  
904 as a tool in taxonomy: a case study in the diverse genus *Eois* (Lepidoptera: Geometridae).  
905 *PLoS One* 7: e49710.
- 906 Thompson JN. 1989. Concepts of coevolution. *Trends in Ecology & Evolution* 4: 179–183.
- 907 Thompson JN, Pellmyr O. 1991. Evolution of oviposition behavior and host preference in  
908 Lepidoptera. *Annual Review of Entomology* 36: 65–89.

- 909 Wagner CE, Keller I, Wittwer S, Selz OM, Mwaiko S, Freuter L, Sivasundar A, Seehausen O.  
910 2013. Genome-wide RAD sequence data provide unprecedented resolution of species  
911 boundaries and relationships in the Lake Victoria cichlid adaptive radiation. *Molecular*  
912 *Ecology* 22: 787–798.
- 913 Wilson J, Forister M, Dyer LA, O’Conner JM, Burls K, Feldman CR, Jaramillo MA, Miller JS,  
914 Rodríguez-Castañeda, Tepe EJ, et al. 2012. Host conservatism, host shifts and diversification  
915 across three trophic levels in two Neotropical forests. *Journal of Evolutionary Biology* 25:  
916 532–546.
- 917 Wink M. 2003. Evolution of secondary metabolites from an ecological and molecular  
918 phylogenetic perspective. *Phytochemistry* 64: 3–19.
- 919 Zagrobelny M, Bak S, Rasmussen AV, Jørgensen B, Naumann CM, Møller BL. 2004.  
920 Cyanogenic glucosides and plant–insect interactions. *Phytochemistry* 65: 293–306.
- 921 Yonekura-Sakakibara K, Higashi Y, Nakabayashi R. 2019. The origin and evolution of plant  
922 flavonoid metabolism. *Frontiers in Plant Science* 10: 943.
- 923 Zhang Y, Deng T, Sun L, Landis JB, Moore MJ, Wang H, Wang Y, Hao X, Chen J, Li S, Xu M.  
924 2020. Phylogenetic patterns suggest frequent multiple origins of secondary metabolites  
925 across the seed plant “tree of life”. *National Science Review*, in press.
- 926 Zheng L, Ives AR, Garland T, Larget BR, Yu Y, Cao K. 2009. New multivariate tests for  
927 phylogenetic signal and trait correlations applied to ecophysiological phenotypes of nine  
928 *Manglietia* species. *Functional Ecology* 23: 1059–1069.

**Table 1.** Estimates of phylogenetic signal (D) (Purvis and Fritz, 2010) for a subset of metabolite classes (see Methods for explanation of subset). To ask whether traits evolved under scenarios of Brownian motion (D = 0) or phylogenetic randomness (D = 1), observed values of D were compared to null distributions of D modeled under each scenario.

| Metabolite class          | Observed D | $\Sigma d_{obs}$ | Randomness (H <sub>0</sub> : D=1) |              | Brownian (H <sub>0</sub> : D=0) |          |
|---------------------------|------------|------------------|-----------------------------------|--------------|---------------------------------|----------|
|                           |            |                  | mean( $\Sigma d_r$ )              | <i>P</i>     | mean( $\Sigma d_b$ )            | <i>P</i> |
| Flavonoids                | 0.49       | 14.18            | 17.56                             | <b>0.012</b> | 11.01                           | 0.093    |
| Chalcones                 | 0.39       | 9.77             | 12.18                             | <b>0.019</b> | 8.24                            | 0.235    |
| Phenolic glycosides       | -1.18      | 3.11             | 7.01                              | <b>0.000</b> | 5.19                            | 0.95     |
| Lignans                   | -0.02      | 4.16             | 5.47                              | <b>0.036</b> | 4.19                            | 0.564    |
| PBA                       | 0.22       | 12.40            | 17.51                             | <b>0.001</b> | 10.96                           | 0.293    |
| <i>p</i> -alkenyl phenols | 0.33       | 9.47             | 12.30                             | <b>0.010</b> | 8.19                            | 0.265    |
| Kavalactones/butenolides  | 0.02       | 5.17             | 6.99                              | <b>0.027</b> | 5.18                            | 0.504    |
| Piper amides              | 0.1        | 5.37             | 7.00                              | <b>0.033</b> | 5.18                            | 0.482    |

929



**Table 2.** Correlated evolution was detected in two pairs of metabolite classes with Pagel's (1994) method: 1) chalcones and flavonoids; and 2) kavalactones/butenolides and *p*-alkenyl phenols. A model comparison framework was employed to evaluate four potential models of trait evolution using AIC: correlated evolution (transition rate in one trait depends on state at another, and vice versa); contingent change (transition rate in one trait depends on state at another, but not the converse); and independent evolution.

| Comparison                                          | Model                                                            | AIC   | $\Delta$ AIC | AIC weight |
|-----------------------------------------------------|------------------------------------------------------------------|-------|--------------|------------|
| Chalcones, flavonoids                               | Chalcones contingent on flavonoids                               | 87.40 | 0            | 0.55       |
|                                                     | Flavonoids contingent on chalcones                               | 88.41 | 1.01         | 0.33       |
|                                                     | Correlated evolution                                             | 90.54 | 3.14         | 0.11       |
|                                                     | Independent evolution                                            | 95.32 | 7.92         | 0.01       |
| kavalactones/butenolides, <i>p</i> -alkenyl phenols | Correlated evolution                                             | 62.35 | 0            | 0.95       |
|                                                     | <i>p</i> -alkenyl phenols contingent on kavalactones/butenolides | 69.65 | 7.29         | 0.03       |
|                                                     | Kavalactones/butenolides contingent on <i>p</i> -alkenyl phenols | 70.61 | 8.26         | 0.02       |
|                                                     | Independent evolution                                            | 71.57 | 9.22         | 0.01       |

931

## 932 **Figure legends**

933

934 **Figure 1.** Maximum clade credibility tree of 48 species from the Radula clade of *Piper* and 23  
935 outgroup species inferred with a Bayesian analysis of 641 concatenated RADseq loci (55,298  
936 base pairs) comprising 9,113 genetic variants (of which 4,674 are parsimony informative). The  
937 outgroup taxa were sampled across multiple *Piper* clades: Isophyllon, Churumayu,  
938 Macrostachys, Hemipodium, Peltobryon, Pothomorphe, and Schilleria. All nodes are supported  
939 by at least 95% posterior support except where noted with circles or labels. Blue circles indicate  
940 support values between 85-95%. Red circles indicate support values between 75-85%. Three  
941 nodes with less than 75% posterior support were given numerical support values. Blue bars at  
942 each node denote the 95% highest posterior density interval on node ages. Diversity of *Piper*  
943 with the clade they belong to in parentheses. Images of outgroups include **A.** *Piper hillianum*  
944 (Macrostachys), **B.** *P. acutifolium* (Peltobryon), and **C.** *P. umbellatum* (Pothomorphe).  
945 Examples of the Radula clade of *Piper* include **D.** *P. pseudofulgineum*, **E.** *P. conceptionis*, **F.** *P.*  
946 *disparipes*, **G.** *P. friedrichsthalii*, **H.** *P. dilatatum*, **I.** *P. bredemeyeri*, **J.** *P. immutatum*, **K.** *P.*  
947 *erubescentspicum*, and **L.** the widespread and often weedy *P. aduncum*.

948

949 **Figure 2.** Taxa comprise the columns of the matrix and are ordered according to their inferred  
950 phylogenetic relationships. Groups of columns are colored according to their designated *Piper*  
951 clade. Black circles within the phylogenetic tree designate nodes with posterior support values  
952 greater than 85%. Each row of the matrix represents a metabolite class which was detected from  
953 <sup>1</sup>H NMR, GC-MS, and LC-MS data, with dark grey cells indicating the presence of that class in  
954 that taxa. Rows outlined in white indicate traits which were analyzed for phylogenetic signal in  
955 Radula. To the left of the matrix are representative compounds for a subset of metabolite classes  
956 which were detected in our samples.

957

958 **Figure 3.** Evolutionary associations were detected in two pairs of traits according to Pagel's  
959 (1994) test of correlated evolution: 1) flavonoids and chalcones and 2) *p*-alkenyl phenols and  
960 kavalactones/butenolides. Filled shapes indicate presences and unfilled shapes indicate absences  
961 of flavonoids (circles), chalcones (squares), *p*-alkenyl phenols (diamonds), and

962 kavalactones/butenolides (triangles), respectively. The shapes used in the cophylogenetic plots  
963 (**A** and **C**) are repeated below (**B** and **D**) to depict four states comprising all combinations of  
964 presences and absences in the pair of traits. Arrows represent transition rates between states. **B**.  
965 As both models of contingent change provided good fits to the flavonoid and chalcone data, both  
966 sets of transition rates are displayed, with the first set of values (bolded) corresponding to the  
967 best supported model (chalcone evolution contingent on flavonoid state) and the second set of  
968 values corresponding to the alternative contingency model (flavonoid evolution contingent on  
969 chalcone state). **D**. The best fit model to the *p*-alkenyl phenol and kavalactone/butenolide data  
970 was one of dependent evolution, where *p*-alkenyl phenol evolution is dependent on the state at  
971 the kavalactone/butanolide trait, and vice versa. Panel **E** illustrates the enzymatic processes and  
972 branch points along biosynthetic pathways that give rise to the four classes of metabolites.  
973 Chalcones are immediate biosynthetic precursors of flavonoids, where the inherent reactivity of  
974 the chalcone moiety permits cyclization to the flavonoid scaffold. Subtle structural changes to  
975 the flavonoid scaffold caused by late-stage oxidation can produce protoflavonoids, a rare class of  
976 metabolite with potent cytotoxic activity. In contrast, the pathways of *p*-alkenyl phenols and  
977 kavalactones diverge much earlier and embark on distinct chain elongation pathways which lead  
978 to long-chain lipophilic substituent characteristic of the *p*-alkenyl phenols in one case, and  
979 lactones (kavalactones and butenolides) in the other case.

980  
981 **Figure 4. A.** Chemospace of all 71 species constructed with the crude <sup>1</sup>H NMR data across 277  
982 peaks. Point shapes and colors are formatted according to clade designation as portrayed in the  
983 phylogenetic tree in Figure 1. MRM analyses recovered significant negative relationships  
984 between phylogenetic and chemical distances calculated among samples from all clades (**B**), or  
985 from the *Radula* clade only (**C**); however, the proportion of variance explained was low for all  
986 tests.  
987

988 **Fig. 1**

989

990

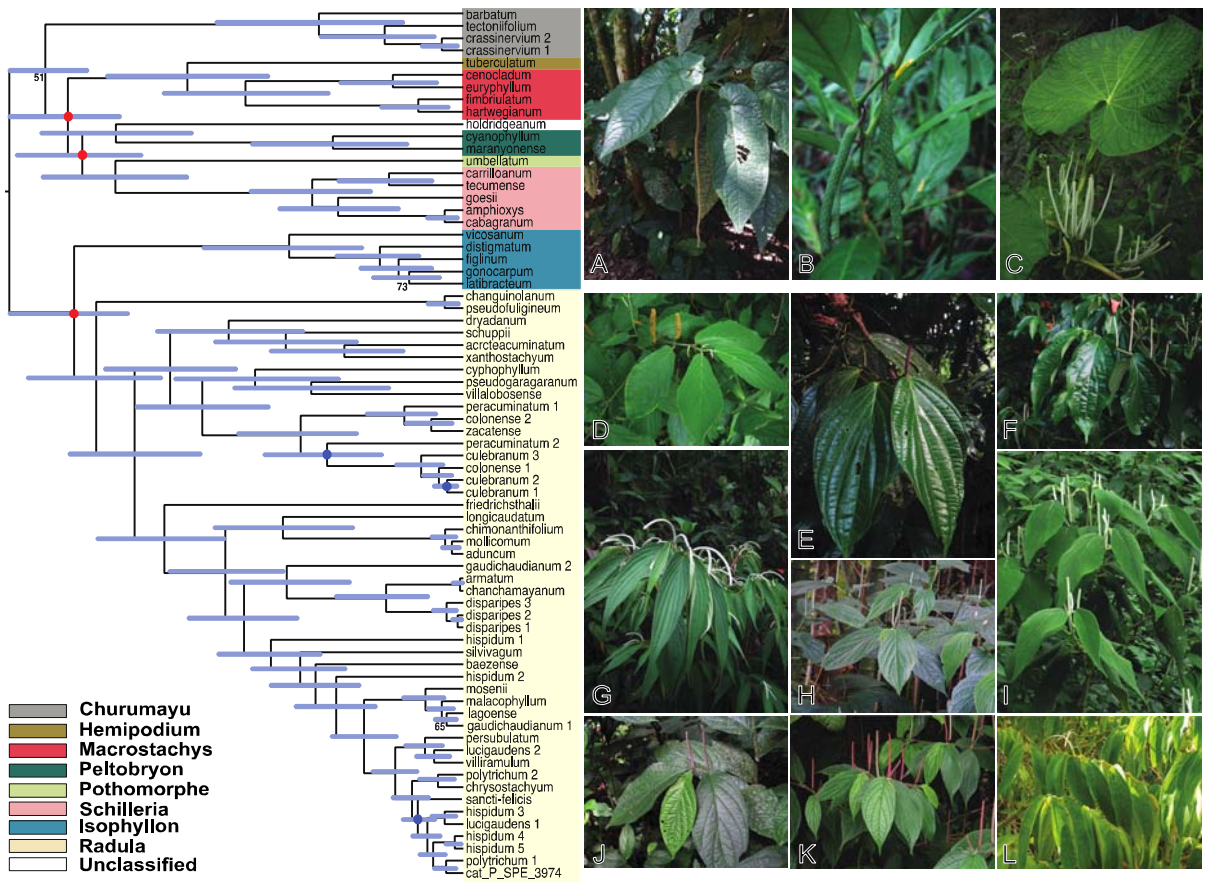



994 **Fig. 3**

995

996

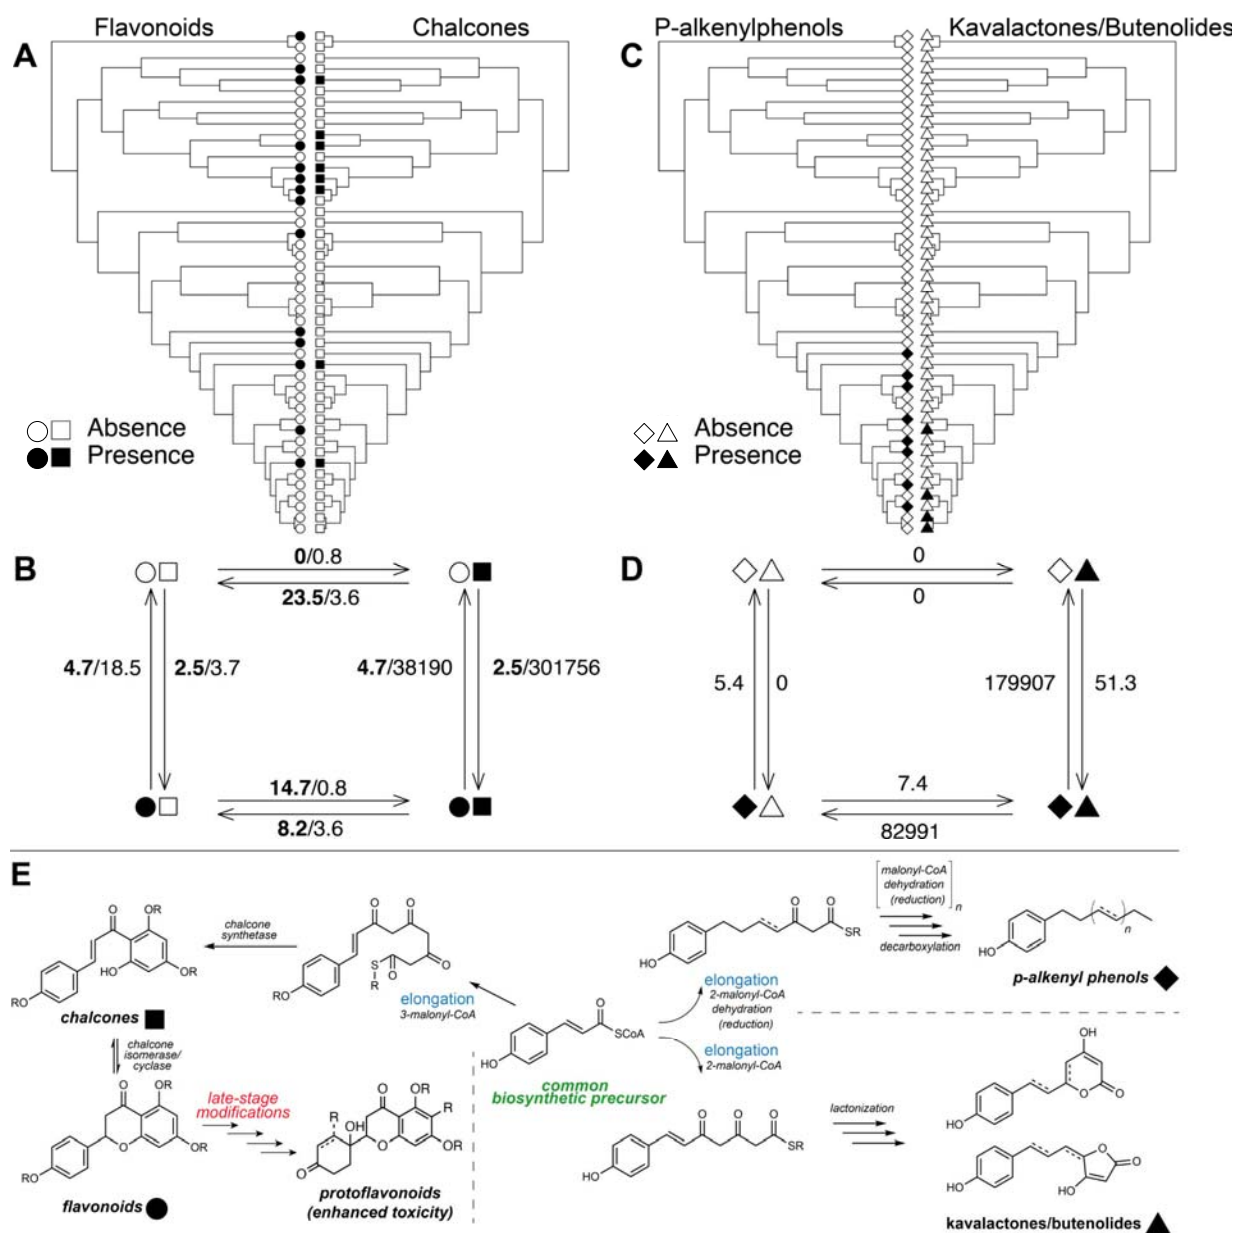

997 **Fig. 4**

998

999

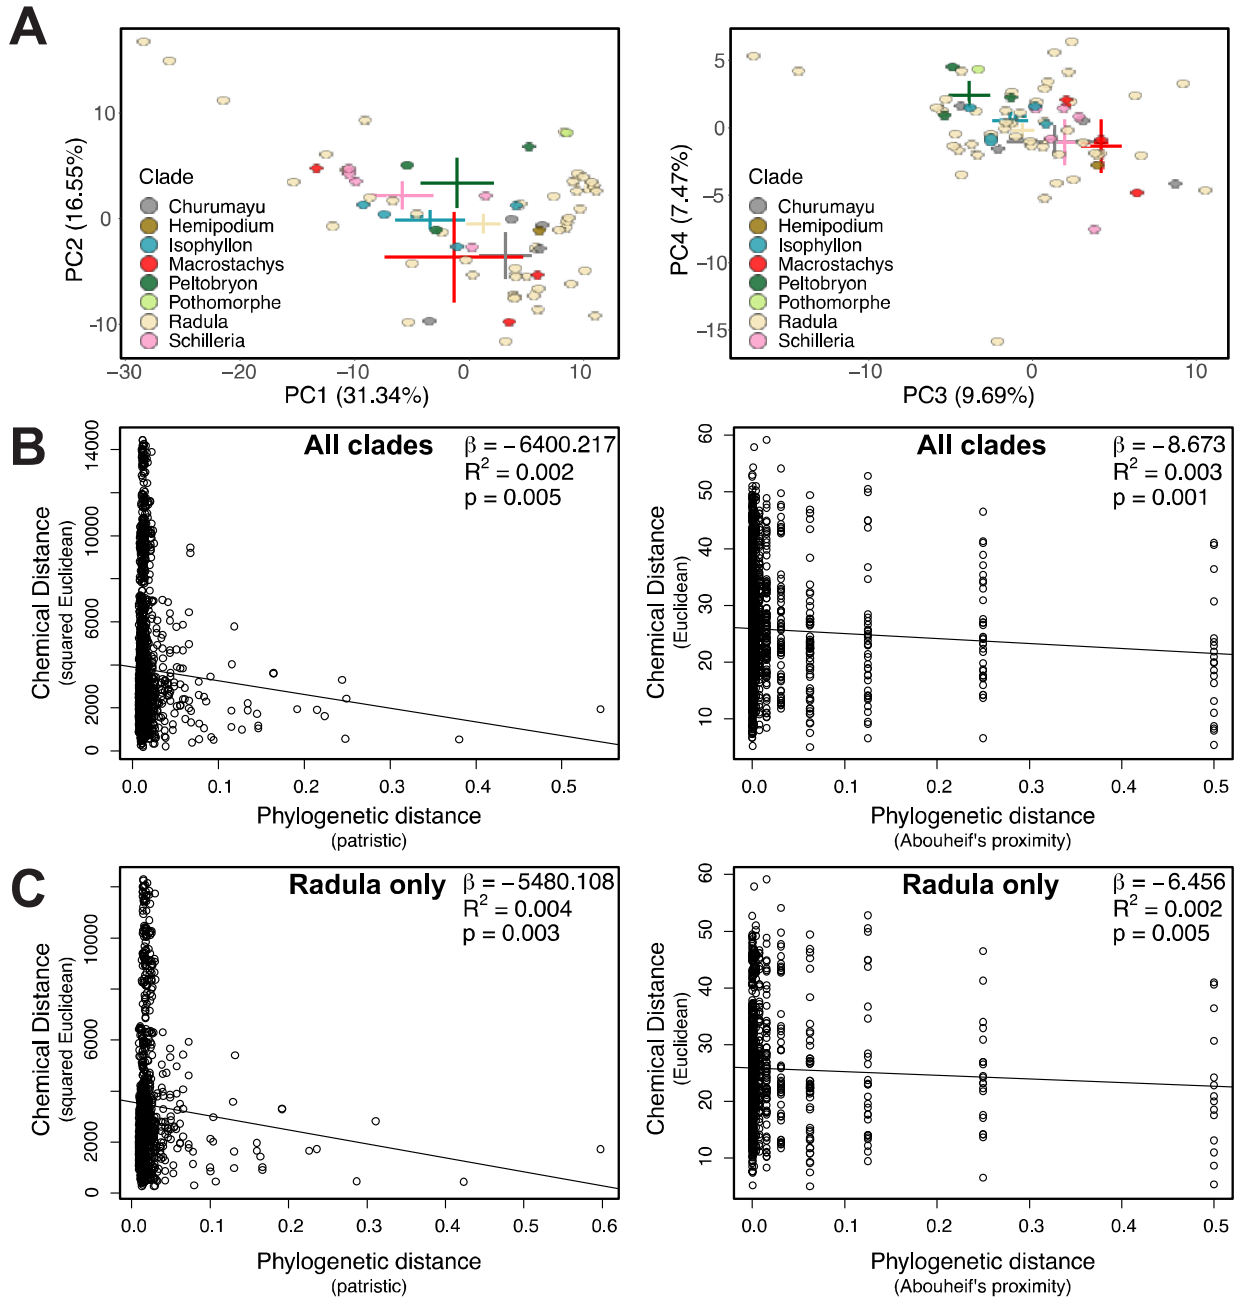

Source: http://biorxiv.org/content/10.1101/2020.11.30.404855v1.full.pdf
